# Supplementary material
Source: PubMed Central journal article supplement (PMC2957473)
Supplement: NIHMS237727-supplement-01.pdf [file NIHMS237727-supplement-01.pdf]

**Figure S1, related to Figure 1.** PcG gene expression in SNF5-deficient cells. (A-D) Scatter plots of PcG gene expression in primary MRT compared to normal cerebellum. (E) Scatter plot of Actin expression in primary MRT compared to prostate cancer. (F-J) Scatter plots of PcG gene expression in Snf5-deficient lymphomas compared to control CD8+ T-cells. (K-O) Scatter plots of PcG gene expression in Snf5-deficient MEFs compared to control MEFs. Snf5 occupies the *Ezh2* gene in MEFs. (P) Occupancy of Snf5 at the *Ezh2* promoter was determined using chromatin immunoprecipitation. Relative enrichment is calculated by dividing the Snf5 bound, RNA polymerase II or IgG bound DNA to input DNA after normalization to a negative binding region (the *Igx1a* negative control region, SA Biosciences). Data are represented as mean +/- SEM from three biological replicates for Snf5 and IgG and two biological replicates for RNA polymerase II. \* p = 0.02 \*\* p = 0.005. (Q) ChIP analysis at the *Ezh2* promoter in Snf5-deficient MEFs. Occupancy of Snf5 at the *Ezh2* promoter was determined in Snf5-deficient MEFs using chromatin immunoprecipitation. Relative enrichment is calculated by dividing the Snf5 bound, RNA polymerase II or IgG bound DNA to input DNA after normalization to a negative binding region. Data are represented as mean +/- SEM from two biological replicates.

Figure S2, related to Figure 2

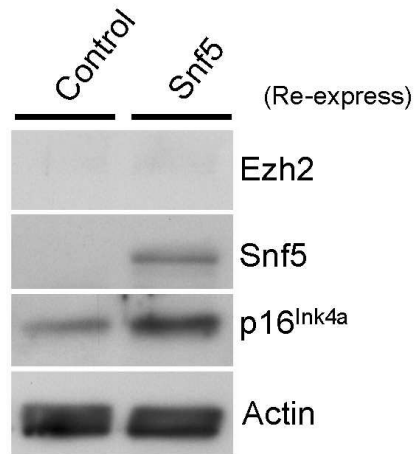

Snf5 Ezh2-deficient MEFs

**Figure S2, related to Figure 2.** Reversal of p16<sup>Ink4a</sup> downregulation via re-introduction of Snf5 into MEFs lacking Snf5 and Ezh2. Immunoblot analysis of p16<sup>INK4a</sup> after re-expression of Snf5 into *Snf5<sup>fl/fl</sup> Ezh2<sup>fl/fl</sup>* MEFs. Actin was used as a loading control.

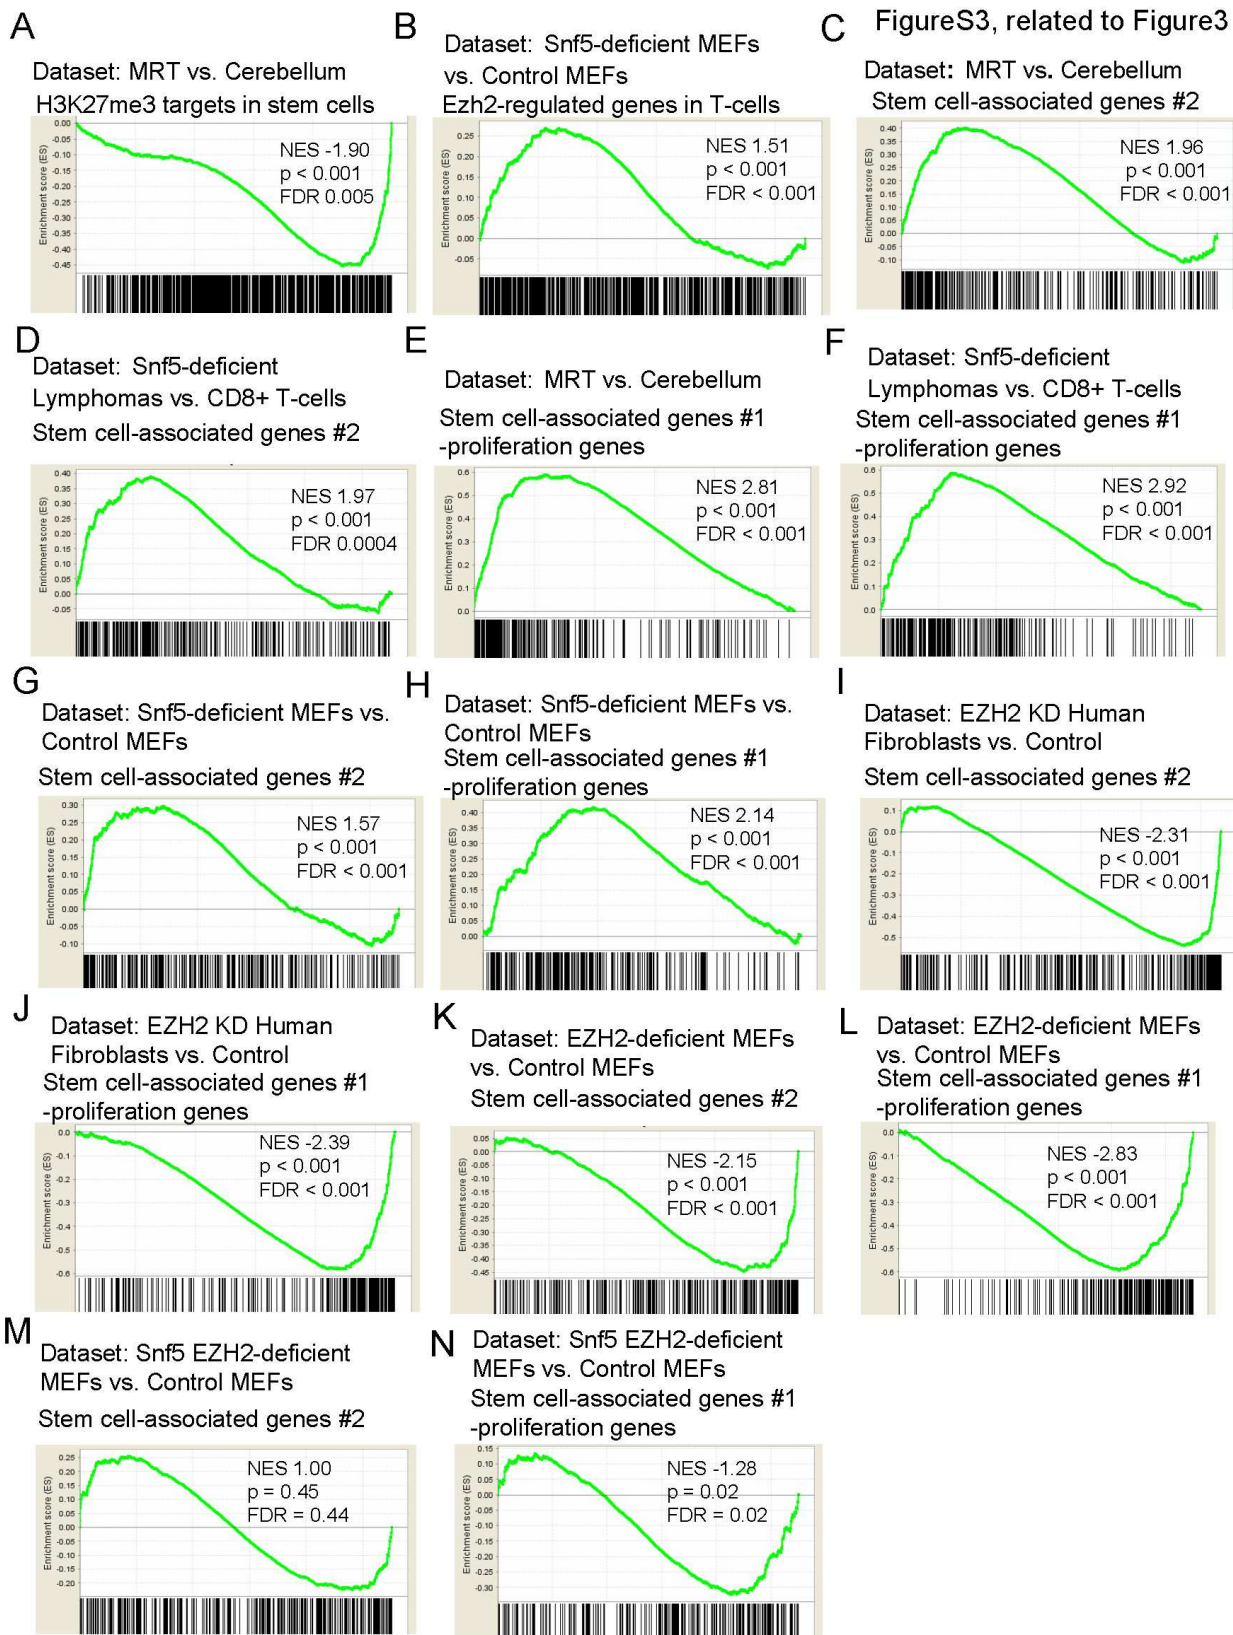

**Figure S3, related to Figure 3.** The antagonistic effects of EZH2 and SNF5 upon gene expression are broad based. (A) GSEA of H3K27me3 target gene set in stem cells (Ben-Porath et al., 2008) in expression data from human MRT samples compared to normal cerebellum. (B) GSEA of a T-cell specific Ezh2-regulated gene set (Su et al., 2005) in expression data from Snf5-deficient MEFs compared to control MEFs. (C) GSEA of the stem cell-associated program #2 in expression data from human MRT samples compared to normal cerebellum. (D) GSEA of the stem cell-associated program #2 in expression data from purified CD8+ Snf5-deficient lymphomas compared to CD8+ T-cells purified from wild type mice. (E) GSEA of a proliferation-corrected stem cell-associated program in expression data from human MRT samples compared to normal cerebellum. (F) GSEA of a proliferation-corrected stem cell-associated program in expression data from purified CD8+ Snf5-deficient lymphomas compared to CD8+ T-cells purified from wild type mice. (G) GSEA of the stem cell-associated program #2 in expression data from Snf5-deficient MEFs compared to control MEFs. (H) GSEA of a proliferation-corrected stem cell-associated program in expression data from Snf5-deficient MEFs compared to control MEFs. (I) GSEA of the stem cell-associated program #2 in previously published expression data (Bracken et al., 2006) from human fibroblasts where EZH2 levels have been knocked down. (J) GSEA of a proliferation-corrected stem cell-associated program in previously published expression data (Bracken et al., 2006) from human fibroblasts where EZH2 levels have been knocked down. (K) GSEA of the stem cell-associated program #2 in expression data generated from Ezh2-deficient MEFs compared to control MEFs. (L) GSEA of a proliferation-corrected stem cell-associated program in expression data generated from Ezh2-deficient MEFs compared to control MEFs. (M) GSEA of the stem cell-associated program #2 in expression data generated from Snf5 Ezh2-deficient MEFs compared to control MEFs. (N) GSEA of a proliferation-corrected stem cell-associated program in expression data generated from Snf5 Ezh2-deficient MEFs compared to control MEFs. The stem cell-associated gene set #2 used in these analyses was previously published (Ben-

Porath et al., 2008). The proliferation-corrected stem cell gene set was previously published (Somerville et al., 2009). Gene sets are listed in Table S1.

Figure S4, related to Figure 4

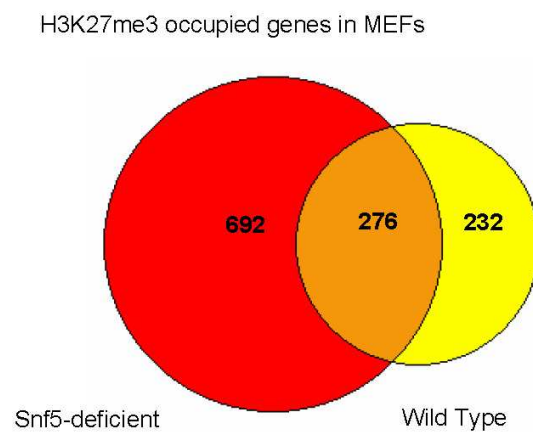

**Figure S4, related to Figure 4.** Elevated levels of H3K27me3 following Snf5 loss. Venn diagram showing H3K27me3 occupied regions in wild type and Snf5-deficient MEFs.

Figure S5, related to Figure 5

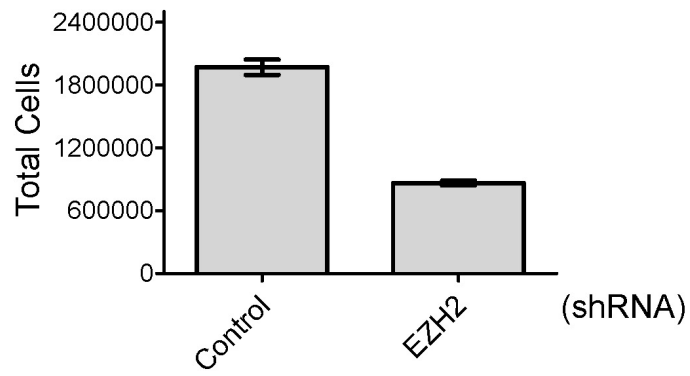

**Figure S5, related to Figure 5.** Ezh2 is required for growth of SNF5-deficient cells. Slowed proliferation of the MRT cell line, BT16, after EZH2 knock down. Cells were counted following shRNA-mediated knock-down of EZH2. Data are represented as mean  $\pm$  SEM.

## **Supplemental Experimental Procedures**

### **Cell Culture**

MEFs were harvested at embryonic day 13.5 and cultured in Dulbecco's modified eagle media (DMEM) supplemented with 10% fetal bovine serum (FBS) and non-essential amino acids. The malignant rhabdoid tumor cell lines, G401 and BT16, were cultured in DMEM supplemented with 10% FBS and 50 $\mu$ M  $\beta$ -mercaptoethanol.

### **Snf5 re-expression**

The pBABE-Snf5 construct was generated in two steps: (1) a PCR amplified fragment bearing murine Snf5 was cloned into the pEfrFlag-Bio-puroAV1 plasmid (Kim et al., 2009) that had been digested with *Bam*HI, and (2) the pBABE-Snf5 construct was generated by subcloning a BglIII-Sall fragment from the pEfrFlag-Bio-Snf5-puroAV1 construct into the pBABE-puro vector (Morgenstern and Land, 1990) that had been digested with *Bam*HI and *Sall*. Snf5 was re-expressed using this construct three days following adeno-Cre mediated inactivation of Snf5 and Ezh2 in MEFs. After 2 days of selection in puromycin (2.5 $\mu$ g/ml), cells were collected and extracts were analyzed by immunoblotting.

### **EZH2 knockdown**

EZH2 knockdown was achieved in 2 ways: first, siRNAs (100nM) which specifically target EZH2 (ON-Targetplus SMARTpool; L-004218-00-0005) or non-silencing controls (siGENOME Non-Targeting siRNA #2; D001210-02-05) were transfected into the G401 cell line using oligofectamine (Invitrogen; Cat. #12252), second, a doxycycline inducible shRNA targeting EZH2 (pTRIPZ-EZH2; OpenBiosystems #V2THS-63066) or



non-silencing control (pTRIPZ-NS; OpenBiosystems # RHS4743) was transduced into G401 and BT16 MRT cell lines using lentivirus. Expression was initiated by the addition of doxycycline (5  $\mu$ g/ml). To achieve greater efficiency, cells expressing the highest levels of shRNA and RFP<sup>+</sup> were sorted (top 10%) using FACS and used for further analyses.

### **Cell proliferation, apoptosis, and senescence assays**

Cell proliferation was monitored by counting cells and by using the WST-1 cell proliferation reagent (Roche Applied Science, cat# 11644807001). Apoptosis was detected by immunoblotting for the PARP1 cleavage fragment. For a positive control, HeLa cells were treated with doxorubicin (1.5 $\mu$ M) for ~24 hours. Senescence associated  $\beta$ -galactosidase activity was measured following doxycycline addition. To stain for Beta-galactosidase cells were fixed using 0.5% glutaraldehyde, washed with PBS pH 6.0 + 1mM MgCl<sub>2</sub>, stained overnight at 37°C with SA- $\beta$  gal solution (PBS (pH 6.0), 2mM MgCl, 5mM K<sub>3</sub>Fe(CN)<sub>6</sub>, 2mM C<sub>6</sub>FeK<sub>4</sub>N<sub>6</sub>, 1mg/ml X-gal (Promega #V394A)) and photographed.

### **Immunoblots**

Whole cell extracts were prepared by incubating cells on ice in lysis buffer (50 mM Tris-HCL pH 7.4, 5mM EDTA, 12% Glycerol, 50mM NaCl, 1% NP-40) plus protease inhibitors (Complete, Mini, EDTA-free Roche; cat. #11836170001 and 2mM PMSF) for 30 minutes. This was followed by spinning for 10 minutes in a 4°C centrifuge at 18000 r.c.f. to separate cell debris. Supernatants were collected and protein concentrations were then determined using the Bradford reagent (BioRad). Proteins were separated using SDS-polyacrylamide gel electrophoresis and transferred to PVDF membranes (Millipore).

### **Chromatin immunoprecipitation**

For the dual cross-linking Snf5 ChIP procedure,  $\sim 1 \times 10^7$  cells were crosslinked for 45 minutes with 2mM Disuccinimidyl glutarate (DSG; Pierce, #20593) in PBS + 1mM MgCl<sub>2</sub> at room temperature and then crosslinked again using formaldehyde (1%)(Sigma,#F8775) for 15 minutes in PBS +1mM MgCl<sub>2</sub> at room temperature. Crosslinked cells were scraped off the plate into PBS + 2×protease inhibitors (Complete, Mini, EDTA-free Roche; cat. #11836170001) and frozen directly as a cell pellet at -80C. These cells were then lysed using 400 µl of lysis buffer (0.5% SDS, 10mM EDTA, 50mM Tris (pH 8.0)) + protease inhibitors for 10 minutes on ice and sonicated 3× for 8 to 10 second pulses on power setting 3 using the sonic dismembrator (Fisher; Model 100). Supernatants were collected after centrifugation for 10 minutes at 18,000 r.c.f. Sonicated extracts were combined with a mixture of protein A (Invitrogen; 100.01D) + protein G (Invitrogen; 100.03D) dynal beads coupled to antibodies which recognize Snf5 (Bethyl, A301-087A) and incubated over night at 4°C. Beads were then washed 1× with buffer1 (0.1% SDS, 1% Triton X-100, 2mM EDTA, 20mM Tris-HCl(pH 8.0), 500mM NaCl), 1× with buffer 2 (0.1% SDS, 1% Triton X-100, 2mM EDTA, 20mM Tris-HCl(pH 8.0), 150 mM NaCl), 1× with LiCl wash buffer (20mM Tris-HCl (pH 8.0), 2mM EDTA, 0.7% NaDOC, 1% NP-40, 0.5M LiCl), and 2× TE (10 mM Tris (pH 8.0), 1mM EDTA). DNA was then eluted 2× for 30 minutes at room temperature in 100µl of 1% SDS + 0.1M NaHCO<sub>3</sub>. Eluated DNA was RNase treated, proteinase K treated, and crosslinks were reversed overnight at 65C in 0.2M NaCl. This mixture was then subjected to phenol chloroform extraction and ethanol precipitation before analysis using real time PCR. Primers used in the ChIP analyses are as follows: Ezh2 #1: F-CTTCTTTGTGTGGCTGGGAG, R-AGTCTGTCCTTTGTCTGAGTGC; Ezh2 #2 F-GTCACACGCCTTCCTTCAG, R- TCGGGTTGGTAACGGTCTTA. Upstream p16<sup>Ink4a</sup>: F- GGCTGTGGAGCCAGGTCAGG, R- GCCCAATCGCCAGTCGTGT; End of Exon 1alpha: F- TCGCCCAACGCCCCGAAC, R- TCCTGAACAAAAGTTACCCGACTGC, Exon 1B ARF:

F- ATGGGTCGCAGGTTCTTG, R- ATGTTACGAAAGCCAGAGC. Actin primer sets were used previously (Shen et al., 2008). All additional primer sequences used for H3K27me3 chip in T-cells and lymphoma cells are available upon request.

### **Isolation of mouse cerebellar cells**

Cerebella were dissected from 7-14 days old mice and the pial layer was peeled away, the tissue was treated with trypsin for 20 minutes and triturated into a single-cell suspension using a fine pipette tip. Cell suspension was then washed twice with N2 medium (DMEM/F12 (1:1) supplemented with: 1X N2 supplement, 24 mM KCl, 6mg/ml glucose, 15 mM glutamine and penicillin-streptomycin) with DNaseI, and then passed through a cell strainer before collecting cells.

### **ChIP-chip**

DNA isolated from ChIP experiments and inputs were amplified using ligation-mediated PCR and hybridized to Affymetrix Mouse Promoter 1.0R arrays. The *MAT* algorithm (Johnson et al., 2006) was used to identify promoters enriched in ChIP experiments with a p-value threshold being set at  $1 \times 10^{-4}$  in MEFs and  $1 \times 10^{-6}$  in cerebellum. See table S1. Individual MAT values were retrieved around transcription start sites using an R package developed in-house (available for download at [http://research4.dfci.harvard.edu/dfci/kunlab/files/Wilson\\_etal\\_2010/readAffyBar\\_1.0.tar.gz](http://research4.dfci.harvard.edu/dfci/kunlab/files/Wilson_etal_2010/readAffyBar_1.0.tar.gz)) and the median MAT score at each position was calculated.

### **RNA isolation and Microarray analysis**

Briefly, total RNA was isolated from MEF samples using RNA Trizol per the manufacturer's protocol. RNA was hybridized to Affymetrix Mouse 430A 2.0 arrays, and CEL files were preprocessed using Robust

Multichip Average (RMA). Gene expression data for Snf5-deficient MEFs were generated previously by our lab (Isakoff et al., 2005) Gene expression data for human MRTs were generated previously (McKenna et al. 2008). Human prostate cancer datasets were downloaded from the GEO data repository <http://www.ncbi.nlm.nih.gov/geo/>. GEO accession # for prostate tumors: GDS2545 (Chandran et al., 2007). These data sets include: 65 primary prostate tumors (Pri. Prostate), 25 metastatic prostate tumors (Met. Prostate), and 15 malignant rhabdoid tumors (MRT).

To analyze MRT datasets with Prostate cancer datasets we collapsed probes that recognize the same gene into a common gene identifier based on the highest expressed probe, and thereby cancel out non-functional probes. These collapsed data sets were then merged and rank-ordered based on expression intensity, allowing a cross-platform comparison. p-values were determined using an unpaired t-test.

The Ezh2-deficient T-cell gene set was derived, using Gene Pattern, from the most significantly upregulated genes ( $> 1.5$  fold change,  $p\text{-value} \leq 0.05$ , and score  $< -1$ ) from previously published expression data; GEO accession # GDS2717 (Su et al., 2005). The gene set from EZH2 knock-down human fibroblasts was derived from previously published expression data consisting of genes upregulated following EZH2 knock-down (Bracken et al., 2006). The MEF-specific Ezh2-regulated gene set was derived from significantly upregulated genes ( $p\text{-value} \leq 0.05$  and score of  $< -4$ ) following Ezh2 inactivation in MEFs. A more stringent threshold was used to derive the up in Ezh2-deficient MEFs gene set, using a p-value cut off  $\leq 0.05$  after multiple hypothesis testing. The gene set of random repressed genes was chosen from a list of genes not expressed in wild type MEFs or showing altered gene expression in Ezh2 or Snf5-deficient MEFs. Lastly, non-occupied, expressed H3K27me3 targets in MEFs were chosen randomly. All gene sets are listed in Table S1.

## **Supplemental References**

Chandran, U. R., Ma, C., Dhir, R., Bisceglia, M., Lyons-Weiler, M., Liang, W., Michalopoulos, G., Becich, M., and Monzon, F. A. (2007). Gene expression profiles of prostate cancer reveal involvement of multiple molecular pathways in the metastatic process. *BMC cancer* 7, 64.

Johnson, W. E., Li, W., Meyer, C. A., Gottardo, R., Carroll, J. S., Brown, M., and Liu, X. S. (2006). Model-based analysis of tiling-arrays for ChIP-chip. *Proceedings of the National Academy of Sciences of the United States of America* 103, 12457-12462.

Kim, J., Cantor, A. B., Orkin, S. H., and Wang, J. (2009). Use of in vivo biotinylation to study protein-protein and protein-DNA interactions in mouse embryonic stem cells. *Nature protocols* 4, 506-517.

Morgenstern, J. P., and Land, H. (1990). Advanced mammalian gene transfer: high titre retroviral vectors with multiple drug selection markers and a complementary helper-free packaging cell line. *Nucleic Acids Res* 18, 3587-3596.

## Supplemental Table 1

| <b>Gene set name</b>     | <b>H3K27.targets</b>                | <b>PRC2.targets</b>                 |
|--------------------------|-------------------------------------|-------------------------------------|
| <b>Reference</b>         | <b>(Nat. Genetics, 40, 499-507)</b> | <b>(Nat. Genetics, 40, 499-507)</b> |
| <b># of genes in set</b> | <b>1121</b>                         | <b>654</b>                          |
|                          | ADARB2                              | ABCC8                               |
|                          | ADCY8                               | ABTB2                               |
|                          | ADCYAP1                             | ADAMTS15                            |
|                          | ADRA1A                              | ADAMTS18                            |
|                          | ADRA2A                              | ADARB2                              |
|                          | ADRB1                               | ADCY4                               |
|                          | ADRB3                               | ADCY8                               |
|                          | ALOX15                              | ADCYAP1                             |
|                          | ALX3                                | ADRA1A                              |
|                          | AQP5                                | ADRA2A                              |
|                          | PHOX2A                              | ADRB1                               |
|                          | ASCL1                               | ADRB3                               |
|                          | ASCL2                               | ALOX15                              |
|                          | ASTN1                               | ALX3                                |
|                          | ZFHX3                               | ALX4                                |
|                          | ATF3                                | ANKRD19                             |
|                          | ATOH1                               | ANKRD20A1                           |
|                          | NKX3-2                              | ANKRD20B                            |
|                          | BCL2                                | ANKRD27                             |
|                          | BNC1                                | AQP5                                |
|                          | FOXL2                               | ARHGAP20                            |
|                          | CACNA1B                             | ARL9                                |
|                          | CACNA1D                             | ASCL1                               |
|                          | CACNA1E                             | ASCL2                               |
|                          | CALCA                               | ASTN1                               |
|                          | CBLN1                               | ASTN2                               |
|                          | CBR3                                | ZFHX3                               |
|                          | CD8A                                | ATF3                                |
|                          | CD34                                | ATOH1                               |
|                          | CD70                                | ATOH8                               |
|                          | CDH7                                | NKX3-2                              |
|                          | CDKN2C                              | BARHL1                              |
|                          | CDX2                                | BARHL2                              |
|                          | CIDEA                               | BARX1                               |
|                          | CLCN5                               | BARX2                               |
|                          | CNTFR                               | BCL2                                |
|                          | COL2A1                              | BHLHB3                              |
|                          | COL4A5                              | BHLHB4                              |
|                          | COL4A6                              | BHLHB5                              |
|                          | COL9A2                              | BMP8A                               |
|                          | COMP                                | BNC1                                |

|         |           |
|---------|-----------|
| CRHR1   | BTG2      |
| CRYBA2  | MKX       |
| CTNND2  | TMEM59L   |
| CYP24A1 | FAM89A    |
| CYP26A1 | C1orf32   |
| CYP27B1 | C1orf76   |
| DACH1   | C1orf92   |
| DGKG    | C20orf103 |
| DCC     | C21orf63  |
| DIO3    | C2orf32   |
| DLX1    | C3orf15   |
| DLX2    | CA10      |
| DLX3    | CACNA1B   |
| DLX4    | CACNA1D   |
| DMRT1   | CACNA1E   |
| DRD5    | CACNA1G   |
| DSC3    | CALCA     |
| DUSP4   | CAMK2N1   |
| EFNA1   | CASZ1     |
| EFNA3   | CBLN1     |
| EGR3    | CBLN4     |
| EGR4    | CBR3      |
| EN1     | CBX8      |
| EN2     | CD34      |
| EPAS1   | CD8A      |
| EPHA5   | CDH23     |
| EPHB1   | CDH7      |
| EPHB3   | CDK5R2    |
| ERBB4   | CDKN2C    |
| F2R     | CDX2      |
| FBN2    | CENTA2    |
| FBP1    | CGB7      |
| FGF3    | CGB8      |
| FGF5    | TPPP3     |
| FGF9    | CH25H     |
| GPC5    | CHODL     |
| FOXG1   | CHRDL2    |
| FOXF1   | CHST8     |
| FOXL1   | VSX2      |
| FOXJ1   | CIDEA     |
| FOXE1   | CITED1    |
| FOXD2   | CMTM2     |
| FLI1    | CLCN5     |
| FUT4    | CLEC14A   |
| FZD2    | CLSTN2    |
| GABRA2  |           |

|          |               |
|----------|---------------|
| GABRA4   | CNNM1         |
| GAD2     | CNTRF         |
| B4GALNT1 | COL24A1       |
| GATA2    | COL25A1       |
| GATA3    | COL27A1       |
| GATA4    | COL2A1        |
| GATA6    | COL4A5        |
| GBX2     | COL4A6        |
| GDNF     | COL9A2        |
| GHR      | COLEC12       |
| GHSR     | COMP          |
| GJB2     | CORO6         |
| GPM6B    | CRHR1         |
| PRLHR    | CRLF1         |
| GPR12    | CRTAC1        |
| GRIA2    | CRYBA2        |
| GRID1    | CSMD1         |
| GRIK1    | CSMD3         |
| GRIK3    | CTNND2        |
| GRM7     | GJA9          |
| GSC2     | CXCL14        |
| GUCY1A3  | CXCL16        |
| GUCY2D   | CYP24A1       |
| HBA1     | CYP26A1       |
| HBA2     | CYP26B1       |
| NRG1     | CYP26C1       |
| HHEX     | CYP27B1       |
| MNX1     | DACH1         |
| HLX      | DACH2         |
| HMX2     | DCLK2         |
| FOXA2    | DCC           |
| ONECUT1  | DCHS2         |
| TLX1     | DDAH1         |
| TLX2     | DGKG          |
| HOXB1    | DGKI          |
| HOXB2    | DHH           |
| HOXB3    | DIO3          |
| HOXB6    | DKFZP564O0823 |
| HOXB7    | DKK1          |
| HOXB8    | DKK2          |
| HOXC4    | DLL4          |
| HOXC5    | DLX1          |
| HOXC6    | DLX2          |
| HOXC8    | DLX3          |
| HOXC11   | DLX4          |
| HOXC12   | DMRT1         |



|         |          |
|---------|----------|
| HOXD1   | DMRT2    |
| HOXD3   | DMRT3    |
| HOXD4   | DOK6     |
| HOXD8   | DPF3     |
| HOXD9   | DPY19L2  |
| HOXD12  | DRD5     |
| HOXD13  | DSC3     |
| HSF4    | DSCAML1  |
| HSPA6   | DUOX1    |
| HTR1A   | DUOX2    |
| HTR2C   | DUSP4    |
| HTR7    | ECEL1    |
| IL7     | EFNA1    |
| INSRR   | EFNA3    |
| PDX1    | EGFL6    |
| ISL1    | EGR3     |
| ITGA4   | EGR4     |
| ITPKA   | ELMOD1   |
| JUN     | EN1      |
| KCNA1   | EN2      |
| KCNA3   | EOMES    |
| KCNC2   | EPAS1    |
| KCNC4   | EPB41L4A |
| KCND3   | EPHA5    |
| KCNH1   | EPHB1    |
| KCNK2   | EPHB3    |
| KCNMA1  | ERBB4    |
| KCNQ3   | ESAM     |
| LGALS3  | ESPN     |
| LMX1B   | ESX1     |
| LPL     | F2R      |
| LRP2    | FAM19A4  |
| LTBP2   | FAM43B   |
| LTK     | FAM5B    |
| MAB21L1 | FAM5C    |
| MAL     | FAM80A   |
| MAPT    | FAM84A   |
| MLLT3   | FBN2     |
| CITED1  | FBP1     |
| MSX1    | FBXL8    |
| MT1A    | FBXO3    |
| MT1B    | FEV      |
| MT1H    | FEZ1     |
| MT1M    | FGF20    |
| MYF6    | FGF3     |
| MYO5B   | FGF5     |

|         |           |
|---------|-----------|
| MYOD1   | FGF9      |
| NCAM1   | FIGLA     |
| NEFM    | FLI1      |
| NELL1   | FLJ11235  |
| NEFL    | FLJ13236  |
| NEUROD1 | KIAA1546  |
| NEUROD2 | FLJ32063  |
| NEUROG1 | CCDC140   |
| NFIX    | FLJ33790  |
| NKX2-2  | SLFN11    |
| NKX3-1  | FLJ35409  |
| NKX6-1  | ANKRD18A  |
| NPAS1   | DPY19L2P2 |
| NPR3    | FBLN7     |
| NPTX1   | C8orf47   |
| NPY1R   | FLJ44815  |
| NTRK1   | FLJ45455  |
| NTRK2   | FLJ45983  |
| OCA2    | FLJ46347  |
| OPRD1   | FLRT2     |
| SIX6    | FOXA2     |
| OTX1    | FOXB1     |
| OTX2    | FOXD2     |
| PAPPA   | FOXD3     |
| PAX1    | FOXD4L4   |
| PAX2    | FOXD4L1   |
| PAX3    | FOXD4L2   |
| PAX6    | FOXD4L3   |
| PAX7    | FOXE1     |
| PAX9    | FOXF1     |
| PCDH8   | FOXG1     |
| PDGFRA  | FOXJ1     |
| SLC26A4 | FOXL1     |
| PENK    | FOXL2     |
| PGM5    | FRMD3     |
| PGR     | FUT4      |
| PITX1   | FZD10     |
| PITX2   | FZD2      |
| PITX3   | GABRA2    |
| PKP1    | GABRA4    |
| PLEC1   | GAD2      |
| PLXNA2  | B4GALNT1  |
| PMP22   | B4GALNT2  |
| POLE    | GALNTL4   |
| POU3F1  | GALR2     |
| POU3F4  | GATA2     |

|         |         |
|---------|---------|
| POU4F1  | GATA3   |
| POU4F2  | GATA4   |
| POU4F3  | GATA6   |
| PRKCE   | GBX2    |
| PRKG1   | GDF6    |
| MAPK4   | GDF7    |
| PYY     | GDNF    |
| PTGDR   | GHR     |
| PTGER2  | GHSR    |
| PTGER3  | GIMAP5  |
| PTGER4  | GJB2    |
| PTGFR   | GLT25D2 |
| PTHLH   | GNA14   |
| PXMP2   | GPC5    |
| RASGRF1 | GPM6B   |
| RBP4    | PRLHR   |
| RGS10   | GPR101  |
| RYR3    | GPR12   |
| SCN4B   | GPR120  |
| SCNN1G  | GPR88   |
| SCTR    | GRIA2   |
| SFRP1   | GRID1   |
| SFRP5   | GRIK1   |
| SHH     | GRIK3   |
| SHOX    | GRIN3A  |
| SHOX2   | GRM7    |
| SIM2    | GSC     |
| SIX1    | GSC2    |
| SIX3    | GSX1    |
| SLC1A2  | GSX2    |
| SLC1A4  | GUCY1A3 |
| SLC6A1  | GUCY2D  |
| SLC6A3  | HAND2   |
| SLC9A2  | HBA1    |
| SLC9A3  | HBA2    |
| SLCO2A1 | HES2    |
| SLIT1   | HES7    |
| SRD5A2  | HEY1    |
| SSTR1   | HHAT    |
| SSTR2   | HHEX    |
| ABCC8   | HHIP    |
| TAL1    | HLX     |
| TBX1    | MNX1    |
| TBX2    | HMX2    |
| TBX5    | HMX3    |
| TCEA3   | HOXB1   |

|         |          |
|---------|----------|
| TBX3    | HOXB13   |
| HNF1B   | HOXB2    |
| NR2F2   | HOXB3    |
| THBD    | HOXB6    |
| NKX2-1  | HOXB7    |
| ICAM5   | HOXB8    |
| TLL1    | HOXC11   |
| TP73    | HOXC12   |
| TRH     | HOXC4    |
| TRPC5   | HOXC5    |
| UCN     | HOXC6    |
| UCP1    | HOXC8    |
| VDR     | HOXD1    |
| WNT1    | HOXD12   |
| WNT2    | HOXD13   |
| WNT6    | HOXD3    |
| WNT7A   | HOXD4    |
| WNT10B  | HOXD8    |
| WNT11   | HOXD9    |
| WT1     | HPCAL4   |
| ZIC1    | HPSE2    |
| ZBTB16  | HRK      |
| SLC30A2 | HS3ST3B1 |
| SLC30A3 | HS6ST1P  |
| SLC30A4 | HS6ST3   |
| BTG2    | HSF4     |
| PAX8    | HSPA6    |
| KCNAB1  | HTR1A    |
| NR4A3   | HTR2C    |
| DPF3    | HTR7     |
| ST8SIA2 | ICAM5    |
| EOMES   | IGF2AS   |
| PIP5K1B | IGSF21   |
| SOX14   | IL1RAPL2 |
| BARX2   | IL7      |
| PIR     | INA      |
| LGR5    | INSM2    |
| RGS20   | INSRR    |
| UNC5C   | PDX1     |
| CHRD    | IRX3     |
| NOL4    | IRX4     |
| TRADD   | IRX5     |
| HRK     | ISL1     |
| GALR2   | ISL2     |
| CACNA1G | ITGA4    |
| PHOX2B  | ITPKA    |

|          |           |
|----------|-----------|
| CDK5R2   | JUN       |
| CH25H    | KAZALD1   |
| INA      | KCNA1     |
| SLC6A5   | KCNA3     |
| DGKI     | KCNAB1    |
| REPS2    | KCNC2     |
| MSC      | KCNC4     |
| CRLF1    | KCND3     |
| KLF4     | KCNH1     |
| SLIT2    | KCNH3     |
| LHX2     | KCNK12    |
| KL       | KCNK13    |
| NTN1     | KCNK2     |
| ECEL1    | KCNK4     |
| HAND2    | KCNMA1    |
| ONECUT2  | KCNQ3     |
| NRG2     | KCNV1     |
| CXCL14   | VASH1     |
| SPAG6    | KIAA1199  |
| GNA14    | KIAA1324  |
| FEZ1     | KIAA1666  |
| PDE4DIP  | KIRREL3   |
| FRMPD4   | KL        |
| ZEB2     | KLF4      |
| SV2B     | KY        |
| MAFB     | LBX1      |
| HS3ST3B1 | LGALS3    |
| PTPRU    | LGR5      |
| OLIG2    | LHX2      |
| IRX5     | LHX4      |
| SPON1    | LHX5      |
| HOXB13   | LHX6      |
| MAB21L2  | LHX8      |
| RASL10A  | LMX1B     |
| DMRT2    | TMEM132E  |
| LBX1     | C1orf194  |
| TBR1     | LAYN      |
| SIX2     | C1orf213  |
| SLC27A2  | LOC150221 |
| VAX1     | LOC153684 |
| RIPK3    | NBPF11    |
| STMN2    | RBM32A    |
| PTPRT    | RPRML     |
| FZD10    | C17orf82  |
| IKZF3    | C5orf39   |
| PPM1E    | LOC400120 |

|               |           |
|---------------|-----------|
| VASH1         | DUOXA2    |
| SLITRK3       | LOC440804 |
| DKK1          | LOC441413 |
| SORCS3        | ANKRD20A3 |
| PDZD2         | LOC441426 |
| GLT25D2       | ANKRD20A2 |
| ASTN2         | ANKRD18B  |
| LPHN3         | NDUFA4L2  |
| KCNH3         | TMEM88    |
| OTP           | LPHN3     |
| HEY1          | LPL       |
| DDAH1         | LRCH2     |
| TMEFF2        | LRFN5     |
| FLRT2         | LRP2      |
| C2orf103      | LRRTM1    |
| TMEM59L       | LTBP2     |
| VAX2          | LTK       |
| ABTB2         | LYSMD2    |
| DKFZP564O0823 | MAB21L1   |
| CHRD2         | MAB21L2   |
| OLFML2B       | MAFB      |
| C2orf32       | MAL       |
| EGFL6         | MAPK4     |
| NKX2-8        | MAPT      |
| FBXO3         | MCOLN3    |
| IL1RAPL2      | MESP1     |
| FGF20         | METRNL    |
| LHX6          | MAG1      |
| CNNM1         | FAM81A    |
| KCNV1         | MGC26718  |
| FOXD3         | RSPO2     |
| FOXB1         | MGC39545  |
| DKK2          | MLLT3     |
| PCDH17        | MSC       |
| BHLHB5        | MSX1      |
| RPS6KA6       | MT1A      |
| C13orf15      | MT1B      |
| STXBP6        | MT1H      |
| TMOD2         | MT1M      |
| TBX21         | MT1DP     |
| RAX           | MYF6      |
| VSX1          | MYO5B     |
| WDR8          | MYOD1     |
| DUOX2         | NAGS      |
| NEUROG3       | NAV2      |
| KCNK4         | NCAM1     |

|             |         |
|-------------|---------|
| IRX4        | NEFM    |
| DHH         | NEFL    |
| SPOCK3      | NELL1   |
| IGF2AS      | NEUROD1 |
| WIT1        | NEUROD2 |
| WNT16       | NEUROG1 |
| HPCAL4      | NEUROG2 |
| TPPP3       | NEUROG3 |
| DUOX1       | NFIX    |
| GPR88       | DUOXA1  |
| FLJ11235    | NKX2-2  |
| DLL4        | NKX2-3  |
| HES2        | NKX2-8  |
| FEV         | NKX3-1  |
| KIAA1546    | NKX6-1  |
| DCHS2       | NKX6-2  |
| SIDT1       | NLF1    |
| RP11-35N6.1 | NOL4    |
| CASZ1       | NPAS1   |
| SUSD4       | NPNT    |
| FEZF2       | NPR3    |
| CRTAC1      | NPTX1   |
| MCOLN3      | NPY1R   |
| FBXL8       | NR2F2   |
| GIMAP5      | NR4A3   |
| STK32B      | NRG1    |
| CAMK2N1     | NRG2    |
| BATF3       | OAF     |
| TRIM36      | NT5C1A  |
| ELMOD1      | NTN1    |
| HHAT        | NTNG2   |
| CENTA2      | NTRK1   |
| MESP1       | NTRK2   |
| BARX1       | NPAS4   |
| CYP26B1     | OCA2    |
| KCNK13      | OLFML2B |
| KCNK12      | OLIG2   |
| BARHL1      | ONECUT1 |
| NDUFA4L2    | ONECUT2 |
| CA10        | OPRD1   |
| KIAA1199    | OSAP    |
| CBX8        | OSR1    |
| TTYH1       | OTOP1   |
| GJA9        | OTOP2   |
| TMEM27      | OTOP3   |
| DSCAML1     | OTP     |

|          |             |
|----------|-------------|
| KIAA1324 | OTX1        |
| ARHGAP20 | OTX2        |
| LRCH2    | OXCT2       |
| ZFYVE28  | PAPPA       |
| FAM5B    | PAX1        |
| CXCL16   | PAX2        |
| DMRT3    | PAX3        |
| C21orf63 | PAX6        |
| PRDM12   | PAX7        |
| HPSE2    | PAX8        |
| ALX4     | PAX9        |
| PROK2    | PCDH17      |
| PKNOX2   | PCDH8       |
| NEUROG2  | PDE4DIP     |
| OXCT2    | PDGFRA      |
| CDH23    | FRMPD4      |
| CLSTN2   | PDZD2       |
| EPB41L4A | PENK        |
| LHX5     | PGM5        |
| ROBO3    | PGR         |
| SOX17    | PHOX2A      |
| CHST8    | PHOX2B      |
| HHIP     | PIP5K1B     |
| CSMD1    | PIR         |
| ISL2     | PITX1       |
| IRX3     | PITX2       |
| BHLHB3   | PITX3       |
| RNF128   | PKNOX2      |
| LONRF3   | PKP1        |
| FLJ13236 | PLEC1       |
| SCD5     | PLXNA2      |
| SEMA6D   | PMP22       |
| PIGZ     | PODN        |
| WNT10A   | POLE        |
| ESX1     | POU3F1      |
| ZNF436   | POU3F4      |
| COLEC12  | POU4F1      |
| KAZALD1  | POU4F2      |
| SLCO5A1  | POU4F3      |
| GPR101   | PPM1E       |
| RASSF5   | PRAC        |
| SOX7     | PRDM12      |
| ESPN     | RP11-35N6.1 |
| ANKRD27  | PRKCE       |
| RAB6C    | PRKG1       |
| ZIC4     | PROK2       |



|           |          |
|-----------|----------|
| ANKRD20A1 | PTF1A    |
| ZMYND15   | PTGDR    |
| PRAC      | PTGER2   |
| NKX6-2    | PTGER3   |
| COL25A1   | PTGER4   |
| NT5C1A    | PTGFR    |
| KIRREL3   | PTHLH    |
| NTNG2     | PTPRT    |
| HES7      | PTPRU    |
| INSM2     | PXMP2    |
| OSAP      | PYY      |
| MAG1      | RAB6C    |
| ZNF503    | SHC4     |
| ATOH8     | RASGRF1  |
| CORO6     | RASSF5   |
| IGSF21    | RAX      |
| COL27A1   | RBP4     |
| KIAA1666  | REPS2    |
| TSLP      | C13orf15 |
| WNT3A     | RGS10    |
| NAV2      | RGS20    |
| C3orf15   | RGS9BP   |
| LHX4      | RIPK3    |
| DUOXA1    | LONRF3   |
| ESAM      | RNF128   |
| SLFN11    | ROBO3    |
| SYT12     | RPS6KA6  |
| TMEM88    | RASL10A  |
| OTOP2     | RSPO1    |
| CGB7      | RTN4RL2  |
| CGB8      | RYR3     |
| TIP39     | SCD5     |
| TRIM9     | SCN4B    |
| CSMD3     | SCNN1G   |
| SLITRK1   | SCTR     |
| SORCS1    | SEMA6D   |
| GRIN3A    | SFRP1    |
| DACH2     | SFRP5    |
| SLC24A4   | SGPP2    |
| USH1G     | SHH      |
| TMEM132E  | SHOX     |
| B4GALNT2  | SHOX2    |
| C1orf194  | SIDT1    |
| PODN      | SIM2     |
| BHLHB4    | SIX1     |
| FBLN7     | SIX2     |

|           |         |
|-----------|---------|
| SGPP2     | SIX3    |
| OSR1      | SIX6    |
| ARL9      | SLC10A4 |
| OTOP1     | SLC1A2  |
| ANKRD19   | SLC1A4  |
| CHODL     | SLC24A4 |
| SLC32A1   | SLC26A4 |
| CBLN4     | SLC27A2 |
| LAYN      | SLC30A2 |
| GSC       | SLC30A3 |
| LRFN5     | SLC30A4 |
| NLF1      | SLC32A1 |
| FAM81A    | SLC35F3 |
| CMTM2     | SLC6A1  |
| SLC35F3   | SLC6A3  |
| C1orf76   | SLC6A5  |
| C1orf213  | SLC9A2  |
| C1orf92   | SLC9A3  |
| LOC150221 | SLCO2A1 |
| FLJ32063  | SLCO5A1 |
| CCDC140   | SLIT1   |
| FAM84A    | SLIT2   |
| GDF7      | SLITRK1 |
| FAM19A4   | SLITRK3 |
| LOC153684 | PIGZ    |
| NKX2-3    | BATF3   |
| CLEC14A   | SORCS1  |
| TMEM30B   | SORCS3  |
| NAGS      | SOX14   |
| FAM43B    | SOX17   |
| DCLK2     | SOX7    |
| ADAMTS15  | SPAG6   |
| ADAMTS18  | SPOCK3  |
| GSX2      | SPON1   |
| ADCY4     | SRD5A2  |
| NBPF11    | SSTR1   |
| FOXD4L1   | SSTR2   |
| SLC10A4   | ST8SIA2 |
| C8orf47   | STK32B  |
| GSX1      | STMN2   |
| DOK6      | STXBP6  |
| OAF       | SUSD4   |
| ANKRD18A  | SV2B    |
| COL24A1   | SYT12   |
| NPNT      | TAL1    |
| PTF1A     | TBR1    |

|           |         |
|-----------|---------|
| LYSMD2    | TBX1    |
| FRMD3     | TBX2    |
| HS6ST3    | TBX21   |
| NPAS4     | TBX3    |
| MKX       | TBX5    |
| FLJ33790  | TCEA3   |
| DPY19L2   | HNF1B   |
| METRNL    | TFAP2E  |
| ZADH2     | THBD    |
| RSPO1     | TIP39   |
| FAM80A    | NKX2-1  |
| FOXD4L2   | TLL1    |
| MT1DP     | TLX1    |
| GPR120    | TLX2    |
| VSX2      | TMEFF2  |
| FAM5C     | TMEM27  |
| TFAP2E    | TMEM30B |
| KY        | TMOD2   |
| RSPO2     | CD70    |
| RBM32A    | TP73    |
| ZCCHC16   | TRADD   |
| CYP26C1   | TRH     |
| HMX3      | TRIM36  |
| BARHL2    | TRIM67  |
| FIGLA     | TRIM9   |
| LRRTM1    | TRPC5   |
| OTOP3     | TSLP    |
| DPY19L2P2 | TTYH1   |
| FOXD4L4   | UCN     |
| RTN4RL2   | UCP1    |
| BMP8A     | UNC5C   |
| GALNTL4   | UNQ9433 |
| FAM89A    | USH1G   |
| FOXD4L3   | VAX1    |
| C1orf32   | VAX2    |
| FLJ45455  | VDR     |
| RPRML     | VSX1    |
| C17orf82  | WDR8    |
| RGS9BP    | WIT1    |
| HS6ST1P   | WNT1    |
| ANKRD20B  | WNT10A  |
| FLJ46347  | WNT10B  |
| C5orf39   | WNT11   |
| UNQ9433   | WNT16   |
| GDF6      | WNT2    |
| SHC4      | WNT3A   |

FLJ45983  
LOC400120  
FLJ44815  
FLJ35409  
MGC39545  
DUOXA2  
LHX8  
MGC26718  
TRIM67  
LOC440804  
LOC441413  
ANKRD20A3  
LOC441426  
ANKRD20A2  
ANKRD18B  
AIM1  
ARNTL  
BMP6  
CALCR  
CAMK2B  
RUNX2  
CHN2  
COL12A1  
NKX2-5  
DLX5  
DRD4  
EBF1  
ELAVL2  
EYA4  
EVX1  
FOXF2  
FOXC1  
GABRB2  
GPR6  
GRK5  
HIC1  
HLA-A  
HLA-B  
HLA-C  
HOXA1  
HOXA2  
HOXA3  
HOXA4  
HOXA6  
HOXA7  
HOXA9

WNT6  
WNT7A  
WT1  
ZADH2  
ZBTB16  
ZCCHC16  
ZEB2  
ZFYVE28  
ZIC1  
ZIC4  
ZMYND15  
FEZF2  
ZNF436  
ZNF503  
IKZF3

HOXA10  
HOXA13  
HSPA1A  
HSPA1B  
HSPA1L  
IGFBP3  
KCNQ1  
LMO1  
MEOX2  
MICB  
MSX2  
MYB  
P2RX5  
PDE8A  
POU3F2  
PRKCB1  
SFRP4  
SIM1  
SLC22A3  
T  
TAC1  
TAP1  
TCF21  
TFAP2B  
TGFA  
NR2E1  
TTPA  
TWIST1  
FZD1  
STC2  
DLK1  
NEURL  
DCLK1  
GCM2  
HAND1  
KLK4  
YAF2  
PLXNC1  
HCG9  
PDE10A  
NXPH4  
AATF  
ST8SIA5  
TLX3  
MED31  
NRN1

ZBTB7A  
ETV7  
CLIC5  
CNNM2  
ELOVL2  
KCNQ5  
NRIP3  
TBX20  
LRFN2  
PRDM13  
TMEM106C  
CLIP4  
ULBP2  
ULBP1  
PPP1R14C  
TRIM7  
TFAP2D  
PSD2  
FNDC1  
RSPO3  
SCIN  
KCNK17  
TCEAL8  
FOXQ1  
ARID3C  
FBXL14  
C9orf19  
NKAIN2  
OLIG3  
MMD2  
RFXDC1  
SCUBE3  
FERD3L  
VGLL2  
NKPD1  
FLJ25037  
SLC35D3  
LHFPL3  
hCG\_1985469  
FLJ16165  
LOC441189  
ACADL  
ADRBK2  
ACAN  
BAI2  
BMX

CACNA1A  
CACNB4  
CD38  
CDH6  
CRIP1  
CRMP1  
CSF1  
CYP2J2  
DPP6  
DUSP6  
EGR2  
ELAVL3  
EPHA4  
FBN1  
FOXE3  
GPC3  
GRIN2D  
HTR6  
ICAM4  
IHH  
IMPDH1  
KCNA5  
KCNJ3  
TACSTD2  
MAP6  
MDS1  
NBL1  
NEFH  
NFIA  
NFIC  
NGFB  
NGFR  
NPAS2  
NPY5R  
OVOL1  
PAX5  
POMC  
PRKCH  
RBBP7  
RXRG  
SECTM1  
SLC6A2  
SLC6A11  
SOX9  
SPTB  
TACR1

TNFRSF1B  
ST8SIA4  
PDE8B  
ARHGEF7  
CCNA1  
TCEAL1  
RAB33A  
GABBR2  
HS3ST4  
HS3ST2  
HCN4  
NDRG1  
SPON2  
SEMA4F  
RAB40B  
RAPGEF4  
FRMPD1  
PHLDB1  
PPP1R13B  
COMMD3  
MAPK8IP2  
GPR124  
SLC40A1  
LEF1  
NIN  
RAB9B  
SLC6A20  
SLC30A10  
DPYSL5  
ALOXE3  
XYLT1  
ABCG4  
IRX1  
C1orf115  
FLJ21511  
KCNIP4  
TMEM163  
AMN  
PHYHIPL  
RCSD1  
DNER  
TMEM54  
OSR2  
RBP7  
FAM129A  
ASCL4



NOXO1  
EGFLAM  
SYT6  
MFSD4  
CDC20B  
LGI3  
FAM123A  
UNC5B  
EBF3  
EPHA10  
EIF4E3  
CLEC4G  
MGC52498  
FLJ39739  
ARL5C  
ACCN2  
AMELX  
AMPH  
APBA1  
ATP1A3  
AVPR1B  
BLVRB  
CA7  
CACNB3  
ENTPD2  
ENTPD3  
CD47  
LRBA  
CDH4  
CDX1  
CHAD  
COL8A1  
CPM  
CR2  
CRH  
CYP2A6  
CYP2A7  
CYP2A13  
DCX  
DYNC111  
DTNB  
DUSP8  
EPHA3  
ESR1  
FGF8  
FGF11

FUCA1  
GAST  
GABRG3  
GNAO1  
GPR26  
GRB10  
GRIN1  
GRM6  
GSN  
HLA-F  
IGFBP1  
IL10RA  
IL11  
IRF4  
KCNF1  
KCNJ4  
KCNJ9  
KCNJ10  
KCNK3  
KCNS2  
KCNS3  
LAMB1  
LY6H  
MEIS1  
MMP2  
MT3  
NOVA2  
NPR1  
NRGN  
PCSK2  
PDE1B  
PLP1  
PRKD1  
PTPRN2  
RARA  
RARRES2  
RFX4  
RNF2  
RPS6KA2  
SFTPC  
SH3GL2  
SLIT3  
SNAI2  
SNTB1  
STX1A  
CNTN2

TBXAS1  
THBS2  
TLE2  
SEMA3B  
LHX3  
MADCAM1  
PRSS12  
CBX4  
SKAP1  
ABCC3  
TNFSF9  
ADAM15  
RGS9  
SYT7  
LRAT  
NRXN1  
SLC25A27  
SNCAIP  
RAB11FIP3  
FRAT1  
TRIM28  
RAMP1  
CACNG3  
VAV3  
FBLN5  
FUT9  
HPSE  
C1QL1  
PADI2  
GPD1L  
WSCD1  
SATB2  
SYNE1  
OSBP2  
LMOD1  
CHD5  
NOC2L  
FBXO25  
HEYL  
SLCO3A1  
DDX25  
SOX8  
KCNIP2  
CRYL1  
MLXIPL  
PLLP

CYP39A1  
ACTL6B  
PRKAG2  
IL17D  
ADAM22  
FXD7  
FLJ20184  
CHDH  
SMPD3  
IL17RB  
HR  
PCDHGC4  
ERO1LB  
C14orf132  
SLC17A7  
SLC17A6  
MAN1C1  
RNPEPL1  
KIAA1191  
GALNTL1  
KLHL14  
KLHL1  
SPTBN4  
GRHL3  
CACNG8  
BCAN  
SMOC2  
REEP1  
DLK2  
MLPH  
GCC1  
EFCAB1  
PARP8  
TTLL7  
GKAP1  
ITIH5  
PRRT1  
WNT5B  
ELOVL3  
RTBDN  
C8orf13  
ARID5B  
POLR3GL  
PCGF5  
KIAA1853  
TMEM185A

KISS1R  
GPR174  
FLJ14816  
C1orf94  
LOC89944  
KCNH7  
KLHL13  
EXOC3L2  
CHRD1  
HTRA3  
CAMK2N2  
ADC  
CSMD2  
C1QTNF5  
CENTG1  
PARD3B  
GPR62  
SEZ6  
COX6B2  
DUSP15  
CNTNAP5  
ANKRD43  
C6orf159  
GAB3  
RIMS4  
NOTUM  
SAMD11  
C1orf51  
ANKRD35  
CCDC50  
LOC154761  
PRUNE2  
TMEM20  
ZFPM1  
SLC16A11  
TTLL9  
MGC42105  
SSBP4  
ADAMTS17  
CADM4  
TCTE1  
C11orf45  
TIGD3  
FNDC5  
RASGEF1C  
TMEM151

NEGR1  
CCDC96  
PRR10  
ARL10  
GPR150  
PRR18  
FAM139A  
FAM78A  
KLHL17  
RGAG4  
LOC342897  
FAM70B  
LGICZ1  
CERKL  
MAST4  
SLC26A5  
HES5  
C3orf54  
FLJ16641  
HES3  
MXRA7  
LOC440863

| <b>Stem Cell Associated #2</b>    | <b>Peripheral T-cells</b>  | <b>Human Fibroblasts</b>      |
|-----------------------------------|----------------------------|-------------------------------|
| <b>Nat. Genetics, 40, 499-507</b> | <b>(Cell, 121 425-436)</b> | <b>(Genes and Development</b> |
| <b>380</b>                        | <b>823</b>                 | <b>220</b>                    |
| ACTA1                             | TMEM57                     | EHHADH                        |
| ACTC1                             | SH2D1A                     | NIN                           |
| ACTN3                             | BMPR2                      | C9orf5                        |
| ADD2                              | ZFP99                      | ZCSL3                         |
| PARP1                             | NUP88                      | LEPR                          |
| ALPL                              | TRAF1                      | RBP4                          |
| AMD1                              | VPS54                      | CAV2                          |
| BIRC5                             | LSM14A                     | LYPDC1                        |
| ATP1A2                            | 2700049A03RIK              | SEC11L3                       |
| BMPR1A                            | 2610301B20RIK              | CNTFR                         |
| BUB1                              | CBLB                       | BMP4                          |
| BUB1B                             | CRTC2                      | BMI-1                         |
| C1QBP                             | MYD116                     | FOXC1                         |
| CASP3                             | BTLA                       | NLK                           |
| CBS                               | SERPINB6A                  | CDK6                          |
| CCNA2                             | STK4                       | RARB                          |
| CCNB1                             | DIAP1                      | RAP1A                         |
| CD24                              | PFN2                       | SMAD4                         |
| CDC2                              | ARID3B                     | BIRC3                         |
| CDC6                              | 6430601A21RIK              | MRAS                          |
| CDC20                             | ADIPOR1                    | HDAC9                         |
| CDC25A                            | CBR4                       | MGC15419                      |
| CTSC                              | NGFRAP1                    | FIP1L1                        |
| CHEK1                             | BZW2                       | RREB1                         |
| CRABP1                            | TCF7                       | LYPLA1                        |
| CRABP2                            | NSUN2                      | JUN                           |
| CRMP1                             | LSM3                       | HSPC171                       |
| CSE1L                             | RNF138                     | SPFH2                         |
| CXADR                             | PLSCR4                     | RRAS                          |
| CYP26A1                           | 6230416J20RIK              | CD164                         |
| COCH                              | D16BWG1543E                | PAPPA                         |
| DHFR                              | KBTBD2                     | FLJ26260                      |
| DIAPH2                            | HERPUD2                    | HSA9761                       |
| DLG3                              | ABCG1                      | SOX5                          |
| DNA2L                             | 9130413E14RIK              | CBX8                          |
| DNMT3A                            | R3HDM1                     | C1orf9                        |
| DNMT3B                            | CD69                       | SATB1                         |
| DSG2                              | PHF6                       | GCC2                          |
| ECT2                              | NFYC                       | FOXP1                         |
| SLC29A1                           | A230107N01RIK              | LOC113251                     |
| EPHA1                             | ERGIC2                     | SHFM1                         |

|         |               |          |
|---------|---------------|----------|
| EPRS    | APOBEC3       | TGFB2    |
| ERBB2   | 3930401B19RIK | TM9SF2   |
| ETV1    | CHN1          | MORF4    |
| ETV4    | 4632417K18RIK | SDCCAG8  |
| FABP5   | RNF19         | C9orf80  |
| FEN1    | FGF13         | ATF3     |
| GPC4    | TRIM26        | HNT      |
| FGF2    | ABTB2         | KCNN4    |
| FGF13   | RNF130        | IGSF4    |
| FGFR1   | ARFGEF1       | SOCS3    |
| FKBP5   | 6720467C03RIK | IER3     |
| FOXO1   | MCL1          | WT1      |
| GABRA5  | LOH11CR2A     | MYCL1    |
| GABRB3  | CREBL2        | HOXA5    |
| GAD1    | KATNB1        | TIMP3    |
| GART    | XRN1          | HES1     |
| GJA1    | PDRG1         | MT1G     |
| GLDC    | 1500041B16RIK | SLC17A5  |
| GPM6B   | HERC4         | TNS      |
| GPR19   | 9930013L23RIK | STAT3    |
| MSH6    | SLC25A36      | DPPA4    |
| HAS3    | TOP3A         | PKD2     |
| HELLS   | DCP1A         | FLJ32871 |
| HMGB3   | 9430016H08RIK | C9orf150 |
| HMGA1   | 1700109G14RIK | HECW2    |
| HMMR    | ARHGAP15      | D2LIC    |
| HNRPAB  | EGR2          | RASA4    |
| HSPA4   | UVRAG         | CYP2W1   |
| HSPA8   | MED12         | SF3A1    |
| HSPD1   | PHC1          | TRIM15   |
| ILF3    | AW146242      | ARHGAP24 |
| INDO    | DNM1L         | LYRIC    |
| ITPR3   | CASP9         | TFPI2    |
| JARID2  | EI24          | CDH8     |
| KAL1    | 5730499H23RIK | PELI1    |
| KCNS3   | LOC670853     | CFTR     |
| KIF5C   | SEC24B        | STATIP1  |
| KLKB1   | TRIM13        | BTBD3    |
| KPNA2   | CARD4         | HIC2     |
| KRT8    | FNBP1L        | JMJD3    |
| LCK     | CHIC2         | CA11     |
| LGALS8  | STK39         | TP53I11  |
| TACSTD1 | BC023882      | MMP1     |
| M6PR    | GLYAT         | PCTK2    |
| MAN2A1  | MSL2L1        | TEGT     |
| MARS    | SENP6         | G0S2     |



|         |               |           |
|---------|---------------|-----------|
| MAT2A   | LOC552906     | ITCH      |
| MCM2    | TSC22D3       | KIAA1164  |
| MCM3    | GARNL1        | ABHD5     |
| MCM4    | AP1S2         | TRIM10    |
| MCM5    | CENTD1        | MLN       |
| MCM6    | NT5C3         | PDHX      |
| MCM7    | IFI205        | PTHLH     |
| MFGE8   | SNRK          | FEZ1      |
| MGST1   | 2210010B09RIK | ATP2A2    |
| MICB    | ZFPN1A3       | C9orf9    |
| MRE11A  | MYEF2         | C21orf7   |
| MSH2    | DDX5          | EEA1      |
| NUDT1   | SON           | ZNF117    |
| MTHFD1  | AU020772      | ZNF298    |
| NASP    | PFN3          | STATIP1   |
| NFYB    | 2210013O21RIK | CUGBP2    |
| NODAL   | SLAMF6        | FLJ31265  |
| NPM1    | 4932433N03RIK | C14orf28  |
| NTHL1   | CHD6          | BTRC      |
| NTS     | RBL1          | CENTG1    |
| OAZ2    | RNF44         | RAP2C     |
| ORC1L   | EPC2          | UGT2A1    |
| PAK1    | ZMAT3         | MGC17839  |
| PCDH1   | 2310042D19RIK | DICER1    |
| PDCD2   | TSC1          | SYNE1     |
| PDK1    | C330002I19RIK | ARK5      |
| PFAS    | DGKA          | IMP-3     |
| PIK3CB  | GABARAPL1     | RYBP      |
| PLCB3   | 4833439L19RIK | RAP80     |
| PMAIP1  | KCNS2         | CCNT1     |
| EXOSC9  | TSGA10        | CCND2     |
| PNN     | SUMO1         | SLC35D2   |
| PODXL   | SLC5A3        | THPO      |
| POLE2   | RAN           | ELTD1     |
| POU5F1  | ATXN3         | ABHD2     |
| PPM1B   | DCK           | DUSP6     |
| PPP2R1B | SNX13         | AGPAT4    |
| PPP2R2B | D230019N24RIK | LOH11CR2A |
| PRIM1   | RPL37         | MGC9850   |
| PRIM2   | ATPAF1        | RBM4      |
| PRKX    | APOBEC2       | PPP6C     |
| PRPS1   | FLIIH         | ELISC-1   |
| PTPN2   | PIM2          | LRRC17    |
| PTPRZ1  | PRSS15        | CDKN1C    |
| RAB3B   | DNAJB6        | ASPH      |
| RARRES2 | MAP2K6        | CXorf12   |

|         |               |               |
|---------|---------------|---------------|
| RBBP8   | TEC           | VENTX2P1      |
| RFC3    | PDIA3         | LOC150759     |
| RFC4    | MFAP1         | ZNF37A        |
| ABCE1   | MS4A4C        | IGSF4B        |
| ROBO1   | E430014L09RIK | EPHB2         |
| RPS24   | 9530018I07RIK | STAM2         |
| RRM2    | RABGAP1L      | BG1           |
| SALL2   | TRAPPC6B      | FGF12         |
| SALL1   | INTS7         | ZNF596        |
| SCNN1A  | SENP2         | BNC1          |
| SFRP1   | BLR1          | TRIB1         |
| SFRP2   | A630025C20RIK | KIAA1377      |
| SFRS1   | EPB4.1L2      | LRAP          |
| SFRS7   | CCDC82        | SLC19A2       |
| ST6GAL1 | EXOC4         | DKFZP566E144  |
| SLC6A8  | C80998        | CHST11        |
| SLC16A1 | ZSWIM6        | DKFZp762C1112 |
| SMS     | PBEF1         | CDKAL1        |
| SNRPA   | SETD4         | ITGB1         |
| SNRPN   | CCNG1         | SALL1         |
| SORL1   | SOD1          | KPNA5         |
| SOX2    | RHOA          | FAM53C        |
| SSB     | MALAT1        | IGFBP1        |
| TDGF1   | TXNIP         | OTX2          |
| TEAD4   | D6WSU176E     | TMEM27        |
| TERF1   | HNRPH3        | TGFB114       |
| TFAM    | RNF14         | TRIB1         |
| TIA1    | PHIP          | IL8           |
| TMPO    | HNRPA2B1      | ATXN1         |
| TNNT1   | CCT4          | EDN1          |
| UGP2    | ASB13         | CDK5R1        |
| UNG     | UBE2E3        | LOC388272     |
| VSNL1   | A1447881      | PRO2037       |
| ZIC2    | NFKB1         | DMD           |
| ZIC3    | DGKQ          | PRKG2         |
| ZNF195  | ATP6V1B2      | BPGM          |
| LRP8    | B3GNT5        | AKR1D1        |
| FZD5    | 5830411G16RIK | OR7E24P       |
| DEK     | NFXL1         | SERPINB2      |
| FXR1    | B3GNT2        | AKAP9         |
| USP9X   | DIRC2         | AMMECR1       |
| FZD7    | MARCKSL1      | MGC72104      |
| UTF1    | MAP4K3        | SUI1          |
| IFITM1  | UBE2Q2        | PMAIP1        |
| TMEFF1  | ATG7          | TRPM3         |
| RUVBL1  | 2610018G03RIK | TCF7          |

|          |               |           |
|----------|---------------|-----------|
| PPAP2A   | BRAF          | PVRL2     |
| USO1     | TRPS1         | ZNF542    |
| ADAM23   | HRASLS3       | ULK4      |
| TRIM24   | 2810446P07RIK | HBEGF     |
| HESX1    | GRAMD3        | KCNA1     |
| PROM1    | RYR3          | NPTX1     |
| FUBP1    | ZSWIM4        | GNL3L     |
| DDX18    | CPEB2         | KLF4      |
| MAP7     | 2310058O09RIK | GPR56     |
| CLDN6    | HSPA4L        | BMP2      |
| SYNGR3   | CHD7          | MAD       |
| BUB3     | CYP2J6        | TDE2L     |
| DDX21    | TCP11L2       | SLC2A14   |
| DCLK1    | PELI1         | GPR115    |
| AURKB    | SLC12A2       | SLC14A1   |
| NOLC1    | PLCL1         | CENPF     |
| PTTG1    | 1110014K08RIK | UCP1      |
| MED14    | 4921505C17RIK | ZBTB1     |
| CER1     | EPS15         | C9orf16   |
| HOMER1   | GFI1          | MGC14161  |
| C1orf38  | CTLA4         | NUPL1     |
| GDF3     | PCDHB15       | COL13A1   |
| NFE2L3   | IDE           | CDKN2B    |
| DLG7     | MPP6          | SUGT1     |
| G3BP2    | OTUD4         | PGM2L1    |
| RABGAP1L | EIF4A2        | LOC157567 |
| SRA1     | RBBP4         | SIAT7F    |
| CHAF1A   | RAB28         | COL24A1   |
| DNAJB6   | DNMT3A        | LOC387763 |
| AP1M2    | POLK          | SLC2A3    |
| G3BP1    | GDAP10        | FMNL3     |
| GPR64    | ORMDL3        | ARL7      |
| CEBPZ    | RNF25         | MGC11324  |
| AASS     | RPL39         | AREG      |
| PRMT3    | 9030605E16RIK | DKK2      |
| ZNF267   | PIAS2         | IL6R      |
| TRIM22   | HRB           | HEY1      |
| NPM3     | SERINC5       | ITGA2     |
| TUBB2C   | 1110020G09RIK | VSNL1     |
| LYPLA1   | HIST1H4J      | KIAA0895  |
| OLFM1    | LOC623121     | SLC6A15   |
| MAD2L2   | PURG          |           |
| NOL5A    | LPXN          |           |
| PAICS    | ARHGEF7       |           |
| PAICS    | BCKDHB        |           |
| POLR3G   | 9630054F20RIK |           |

|          |               |
|----------|---------------|
| RAD51AP1 | 2210010L05RIK |
| LEFTY1   | YPEL5         |
| IGF2BP3  | C77626        |
| IGF2BP2  | D330010C22RIK |
| MTHFD2   | GDAP1         |
| NMU      | EMB           |
| KIF2C    | CNKSR3        |
| PIM2     | WDR45L        |
| NUDT21   | BCL6          |
| LECT1    | C81285        |
| DIDO1    | SF11          |
| MYST2    | PHF3          |
| HRASLS3  | ARNTL         |
| PSIP1    | INPP5B        |
| WDHD1    | NR1D2         |
| CHEK2    | RPS6KA5       |
| GPR176   | CDKN2C        |
| OIP5     | GIMAP1        |
| RRAS2    | SLC35D1       |
| MTF2     | TIGD2         |
| SEPHS1   | SLC12A4       |
| GARNL4   | RAB5A         |
| TTLL12   | 2410024A21RIK |
| PASK     | D14ERTD24E    |
| MDN1     | ATP11C        |
| COBL     | ATG4C         |
| BOP1     | AXIN1         |
| NCAPH    | CLK1          |
| FRAT2    | B230334L07RIK |
| SIRT1    | CCDC46        |
| CBX5     | 5730409G07RIK |
| TNPO3    | 9430093I07RIK |
| PRKD3    | H3F3B         |
| KIF4A    | ZFP36L2       |
| RAD54B   | VT11B         |
| NOL11    | RNF38         |
| SFRS18   | AU040320      |
| LRIG1    | MORF4L2       |
| CNTNAP2  | SMC5          |
| AUTS2    | 2610020C11RIK |
| SERBP1   | RAB32         |
| PITPNC1  | HS2ST1        |
| GNL3     | SLA           |
| FOXD3    | 5830436I19RIK |
| ITGB1BP3 | 9030425P06RIK |
| C6orf66  | 9630037P07RIK |

|           |               |
|-----------|---------------|
| CYP2S1    | PECI          |
| PYCR2     | USP11         |
| RRP15     | ZFYVE27       |
| GMNN      | LOC672245     |
| GAL       | AU015263      |
| FAM108B1  | ZFP426        |
| PIPOX     | PRLR          |
| ZNF589    | ARID5B        |
| RNF138    | TOE1          |
| HSPC111   | 5330439A09RIK |
| LARP7     | 1110019D14RIK |
| ESF1      | NPAL3         |
| AZIN1     | MATR3         |
| LSR       | DBR1          |
| GINS2     | ACAD9         |
| GPRC5B    | LMBR1         |
| CECR1     | 2610511M17RIK |
| BRWD1     | PLSCR3        |
| C21orf45  | C030046G05    |
| FAM64A    | AU015680      |
| PUS7      | AU018740      |
| EPB41L4B  | IGF1R         |
| L1TD1     | MTR           |
| ERCC6L    | GLT8D1        |
| RBM35A    | ABCD3         |
| NCAPG2    | D430013B06RIK |
| ZNF770    | ABCC12        |
| PAK1IP1   | NKTR          |
| C12orf48  | CASP3         |
| FANCL     | TFAM          |
| DPPA4     | TOR1AIP2      |
| C14orf115 | 9930031P18RIK |
| NUDT15    | GIMAP6        |
| BXDC2     | TAGAP         |
| C14orf106 | RAB19         |
| LGR4      | 4631422O05RIK |
| MCM10     | SLFN5         |
| PRPF40A   | USP31         |
| TMEM48    | ADRM1         |
| C12orf11  | C030018P15RIK |
| CCAR1     | 4933407C09RIK |
| WDR12     | D630040G17RIK |
| RCC2      | CDKN1A        |
| KLHL7     | ISGF3G        |
| CHST7     | PDIK1L        |
| EXOSC5    | ANP32A        |

|          |               |
|----------|---------------|
| NUP107   | FAM18B        |
| SALL4    | TBC1D23       |
| SLC39A10 | CDADC1        |
| MRS2L    | GPR137        |
| SPC25    | TMEM106B      |
| NLN      | BEXL1         |
| NLGN4X   | 4932414K18RIK |
| MTA3     | DENND2D       |
| ZNF398   | CDC42SE1      |
| SEMA6A   | VDAC3         |
| LRRN1    | GAK           |
| CACHD1   | 4932432N11RIK |
| FAM60A   | USP47         |
| PRDM14   | COPB1         |
| NOC3L    | TIPARP        |
| ISG20L1  | RPL13         |
| SLC13A3  | A730098D12RIK |
| CAPRN2   | RAB11A        |
| DBNDD1   | RAPGEF6       |
| CAMKV    | TRAFD1        |
| NUP37    | AU017263      |
| ELOVL6   | GGH           |
| DCC1     | KLHDC2        |
| GNPTAB   | ANKRD11       |
| C1orf108 | SNX1          |
| NARG2    | TBC1D24       |
| LIN28    | 1110033J19RIK |
| NANOG    | 2900070H08RIK |
| PHF17    | PLEKHB1       |
| NARG1    | CTSD          |
| MYO19    | PRKAR1A       |
| PUS1     | 5830434P21RIK |
| TMEM177  | AI314180      |
| SLC38A1  | HNRPH1        |
| TXNDC1   | C78704        |
| WBSCR16  | UPF2          |
| CDT1     | 0610007P22RIK |
| SPRY4    | 2810482G21RIK |
| TCF7L1   | GNG12         |
| BCL2L12  | PB1           |
| USP44    | TRP53INP1     |
| GINS4    | 1500011J06RIK |
| HPS3     | TMED8         |
| RBM13    | D130073L02RIK |
| SLC7A3   | PRPF39        |
| ZSCAN10  | ASF1A         |

ANGEL2  
KIFC2  
LOC91431  
C20orf72  
DMKN  
EGLN3  
CDCA5  
MAL2  
FAM46B  
SCGB3A2  
GYLTL1B  
LOC157627  
C8orf42  
C11orf82  
ARL5B  
TUBB2B  
CKMT1A

ARMCX2  
TOP1  
IFNG  
PCGF5  
ETS1  
LIMS1  
DUSP1  
HIC2  
HIF1AN  
2310058N22RIK  
6330409N04RIK  
2900010J23RIK  
SELL  
MESDC1  
JAK2  
RAD54L  
CARD6  
SEC11L3  
PHLPP  
ZDHHC20  
PAIP2  
0610042C05RIK  
SLTM  
BBX  
SKAP2  
LOC668373  
H2-M3  
1700018A14RIK  
2310033K02RIK  
PDCD7  
SETD2  
C730024G19RIK  
CSNK1G3  
BC060267  
PDLIM5  
4930402D18RIK  
H3F3A  
6530406A20RIK  
HP1BP3  
RPL23A  
ATG12  
IFNGR1  
1700065A05RIK  
ROD1  
COQ4  
BC067047

CD6  
UBE2E1  
TXN1  
RBBP5  
UCHL5  
ATP11A  
1110020A10RIK  
MBNL1  
KEL  
HIPK3  
ZNF326  
SOCS7  
E130107B13RIK  
PCNP  
HIST1H4H  
BC052040  
ADAR  
LYSMD4  
5730557B15RIK  
2610024D14RIK  
H2-T24  
ZCCHC7  
ARHGAP29  
SLC45A4  
4930512H18RIK  
MAGI3  
PAPOLA  
5730410I19RIK  
SERBP1  
NLK  
FBXO33  
BIRC4  
ZFP746  
MS4A11  
CCR7  
ANKRD17  
JMJD2C  
PDE2A  
SFT2D2  
4930402H24RIK  
4933401H06RIK  
THOC2  
EEA1  
CCDC95  
SOX14  
D14ERTD668E



PTPRD  
DYRK2  
D430015B01RIK  
D13ERTD787E  
SERINC1  
ZFP438  
CCDC50  
1600020E01RIK  
1810047C23RIK  
FKBP8  
IQCB1  
B2M  
PIM2  
SLC4A3  
EPB4.1  
NOTCH1  
RAB37  
CD5  
LRBA  
AU014973  
AI428479  
IFT57  
E130105L11RIK  
AI596198  
NCKAP1L  
D330050I23RIK  
2700019D07RIK  
ELA3  
TXNL1  
NARG2  
TMEM136  
PRKACB  
RBM10  
ZFP313  
DTX3L  
IFI203  
PTPN11  
MBNL2  
PARL  
SLC25A28  
GAPVD1  
2310026E23RIK  
GALNT11  
WDR44  
BC057079  
MLXIP

A230105L22RIK  
TCRB-J  
EPHX1  
ENDOD1  
C230081A13RIK  
CUL1  
2410003K15RIK  
PTK2B  
FBXW7  
SPATA13  
2010300C02RIK  
SMG7  
TTC21A  
PDE4B  
9330128J19RIK  
IFT52  
UBN1  
D030056L22RIK  
ZFAND6  
0610010D24RIK  
LZTFL1  
2700060E02RIK  
3110001A13RIK  
1190005F20RIK  
PAF1  
GRHL1  
IL15  
A730046G19RIK  
UCK2  
SAMD9L  
ARHGEF6  
RAB18  
ID3  
2510009E07RIK  
JARID1C  
NUDT4  
1110059P08RIK  
RSPO4  
STXBP5  
RGNEF  
GIMAP9  
SAA2  
BC037112  
B930008K04RIK  
PIP5K2A  
GBP2

NSD1  
A630051L19RIK  
INPP1  
ANGEL2  
POLL  
NDST1  
ZFP322A  
C230085N15RIK  
PPIG  
CSDA  
PTPN12  
9630007J19RIK  
PTDSS1  
C730034F03RIK  
ZFP46  
9530028C05  
D530014G21RIK  
CYP3A25  
1190003K10RIK  
PDE7A  
2210018M11RIK  
GM71  
SEC31A  
0610010K06RIK  
SENP8  
IRF2  
MTHFS  
AGA  
A230101C19RIK  
CPNE3  
UBE1L  
SUPT3H  
2900011L18RIK  
PHC3  
1810026J23RIK  
IFRD1  
NUP50  
PABPC5  
H2AFZ  
ELMO1  
AU015892  
MPP1  
HIPK1  
ZBTB33  
7030407O06RIK  
HVCN1

RIF1  
KLRE1  
CTDSPL2  
DQX1  
CRTAM  
SCARA5  
NCOA7  
CCRN4L  
MRS2L  
PTEN  
PPP3CB  
TRIM25  
DEF8  
2310047C04RIK  
TEP1  
SFXN2  
WNK4  
RASGEF1A  
TMEM77  
A430106J12RIK  
4933427D14RIK  
ZFP40  
MOBK1B  
GCC1  
CHD9  
GCC2  
E230008J23RIK  
KIAA1715  
CD96  
LIMS2  
A130071D04RIK  
2810027O19RIK  
POLH  
BC057893  
UBE2R2  
9030607L20RIK  
HELLS  
3100002L24RIK  
BC046401  
GANC  
AW112010  
USP32  
TRP53BP1  
1700015E13RIK  
2900064B18RIK  
LLGL2

RUTBC2  
BNIP3L  
CTSB  
SNX16  
ILF3  
NME5  
SGSH  
PITPNC1  
GRAP2  
ASCC3  
RP23-143A14.5  
DCUN1D1  
ZC3H7A  
ECHDC2  
HMGN2  
3110073H01RIK  
UBE2J1  
IFI203  
JMY  
AZI2  
CMAS  
TPCN1  
4921515L22RIK  
KTN1  
PIK3R4  
RIC8A  
MORC3  
CBFA2T2H  
DTX1  
MBTPS1  
KCNA3  
PLEKHK1  
KLF2  
SORD  
2310010B21RIK  
IRF8  
TMEM89  
CMTM3  
LRRC20  
9830147J24RIK  
LRRC47  
2010109N14RIK  
ZFP330  
ARID1A  
1110001A07RIK  
EHD2

RABGGTB  
4930546C10RIK  
1810023F06RIK  
WDR26  
C130098B18RIK  
RNASEN  
BLMH  
UNC5CL  
PPP2R5C  
HKDC1  
ZMYND11  
KCMF1  
SOS1  
D8ERTD82E  
ARID5A  
1810015C04RIK  
AKR1A4  
ANLN  
A930005H10RIK  
ZCCHC11  
TSC22D2  
TBX21  
4631405K08RIK  
C80889  
FDX1  
FXR1H  
TRAF3  
CSNK1A1  
MEF2A  
D630021H01RIK  
HK1  
9430098F02RIK  
TPM3  
9530053H05RIK  
AI316807  
VAMP3  
IL2RB  
CMAH  
MEOX2  
AU020147  
PTER  
POT1  
TRAF6  
HEXA  
ABL1  
SLC6A6

ARL4A  
A230062G08RIK  
SAFB  
CCND3  
7530404M11RIK  
PRAMEL4  
A930001N09RIK  
1190002C06RIK  
NEK6  
HMGB2  
RBAK  
SLCO3A1  
LSM11  
ZNF642  
OAS1C  
ARFIP1  
B930006L02RIK  
ADAM12  
RB1CC1  
2700007P21RIK  
RASSF2  
TCRB-J  
A630043P06  
THRAP6  
HOOK1  
TUG1  
CLIC4  
UBE2N  
D230040A04RIK  
LIN7B  
USP15  
ATP6V1C1  
ARHGAP25  
RPL7A  
XRCC5  
2310050B05RIK  
BC068281  
SH3BGRL  
1810013L24RIK  
6330417G04RIK  
FABP5  
PIK4CA  
1700022C21RIK  
ADM  
RPS24  
IRAK1

4632417N05RIK  
GM114  
EIF5  
C81001  
SLCO4C1  
ROCK1  
DLX1AS  
LOC553096  
HORMAD1  
KIF1B  
5730521K06RIK  
9530068E07RIK  
D830012I24RIK  
HMOX2  
4921509J17RIK  
RAB10  
GM540  
4921525O09RIK  
PLOD2  
CNOT7  
GRAMD1C  
NOL4  
GPR18  
D730035F11RIK  
RPL9  
SGK  
SMARCA4  
SFRS2IP  
2900072G11RIK  
LAMP2  
POLD3  
KERA  
1200020A08RIK  
NRBP1  
CHRD  
D11BWG0434E  
ANKRD13A  
TNFSF9  
PRKCH  
9330180L21RIK  
6720462K09RIK  
2310009E04RIK  
PABPN1  
CCNT2  
PABPN1  
CCNT2

















**Ezh2-regulated genes****MEFs****This Study****573**

ODF4  
RAB27B  
KRT1-14  
MELA  
PCDHB1  
LOC624219  
AAK1  
THRB  
4930413O22RIK  
KNG1  
SLC23A1  
GPRIN1  
A930004K21RIK  
TFF3  
LBP  
AI427122  
CFI  
2310057N15RIK  
LAG3  
THBD  
C77027  
AQP3  
IFNA11  
ARNT2  
CEP164  
BICD1  
CNTN1  
MUSK  
TCL1B4  
5830411J07RIK  
PHXR1  
ITGB1BP2  
GUCA1A  
PI4K2B  
SI  
KLHL2  
D10WSU159E  
EGFL6  
NPY  
RAP1GAP  
B3GNT4

**Stem Cell Associated (Stem Cell Associated H3K27 Targets in W1  
(Cell Stem Cell, 2, 33 (Cell Stem Cell, 4, 12) This Study****335**

ABCB7  
ADH5  
PARP1  
ADSL  
AK3L1  
ALDOC  
SLC25A5  
APEX1  
BIRC5  
ALDH7A1  
ATP5J  
ATP5O  
BAX  
BCAT1  
CCND1  
BLM  
BTF3  
BUB1  
BUB1B  
SERPINH1  
CCNA2  
CCNC  
CCND2  
CCNF  
CDC2  
CDC6  
CDC20  
CDC34  
CDK4  
CDKN1C  
CDKN3  
CTSC  
RCC1  
CHEK1  
CKS1B  
CKS2  
COX5B  
CRABP2  
CSE1L  
CSRP2  
CTNNA1

**263**

ABCB7  
ACAD8  
ADH5  
ADSL  
AK3L1  
ALDH7A1  
ALDOC  
AMOTL2  
ANP32E  
APEX1  
ATP5J  
ATP5O  
BANF1  
BAX  
BTF3  
BXDC2  
C11orf48  
C2orf47  
CBX3  
CCNC  
CCND2  
CCT5  
CDCA3  
CDCA7  
CHEK2  
CKAP2  
CKS1B  
CKS2  
CLPP  
COQ3  
COX4NB  
COX5B  
CRABP2  
CSE1L  
CSRP2  
CTNNA1  
CTSC  
CYCS  
DAP3  
DARS2  
DDX18

**508**

1110033F04RIK  
1700003E16RIK  
1700031F05RIK  
1700049G17RIK  
1700109F18RIK  
2300005B03RIK  
2810451A06RIK  
2810459M11RIK  
2900083I11RIK  
3110001I20RIK  
3110006E14RIK  
4930451C15RIK  
4930486L24RIK  
4933417O08RIK  
6330403A02RIK  
6330514A18RIK  
6330527O06RIK  
9030421J09RIK  
9430069J07RIK  
A230079K17RIK  
A230106N23RIK  
A230107C01RIK  
AB041550  
AB080658  
ABCG5  
ABCG8  
ACCN2  
ACCN4  
ACP1  
ADAMTS16  
ADCYAP1  
ADRA2A  
ADRA2C  
AJAP1  
AK002250  
AK005877  
AK006202  
AK006321  
AK006752  
AK017076  
AK017182



|                      |          |          |               |
|----------------------|----------|----------|---------------|
| ACTN2                | DHX9     | DEK      | AK018772      |
| HYAL1 /// NAT6       | TIMM8A   | DHX9     | AK019375      |
| NEUROD4              | DLAT     | DLAT     | AK020867      |
| SPI16                | DNMT1    | DNMT1    | AK031498      |
| LOC625794            | DTYMK    | DPP3     | AK033245      |
| GRPR                 | E2F3     | DTYMK    | AK033378      |
| NELL2                | ECHS1    | E2F3     | AK033508      |
| TH                   | PHC1     | EBNA1BP2 | AK036422      |
| DOKIST2              | EEF2     | ECHS1    | AK036843      |
| ABCD1                | EIF2S3   | EEF1E1   | AK037113      |
| RBP2                 | EIF4A1   | EEF2     | AK039090      |
| CPA2                 | EIF4B    | EIF2S2   | AK041096      |
| EPHA5                | EIF4EBP1 | EIF2S3   | AK043747      |
| IER5                 | ENO1     | EIF3S10  | AK044313      |
| OLFR71               | FBL      | EIF3S12  | AK046385      |
| V1RA5                | ETFA     | EIF3S2   | AK046737      |
| CRISP1               | FARSA    | EIF3S6IP | AK053193      |
| CLDN5                | FDPS     | EIF4A1   | AK081588      |
| BB001228             | FGFR1    | EIF4B    | AK085522      |
| ZFAND6               | FH       | EIF4EBP1 | AK132940      |
| 2310067B10RIK        | GARS     | ELOVL6   | AK134673      |
| AA589418             | GART     | ENO1     | AK135975      |
| H2AFJ /// LOC632401  | GJA1     | ERCC6L   | AK144266      |
| FCMD                 | GLDC     | ERP29    | AK144536      |
| C77815               | GLO1     | ETFA     | AK145180      |
| ZXDC                 | HADH     | EXO1     | AK161769      |
| AEBP1                | HDAC1    | EXOSC7   | AK162942      |
| 2310002A05RIK /// SP | HELLS    | FAM136A  | AK163433      |
| OTOS                 | HMGB2    | FAM60A   | AK210533      |
| SLC25A29             | HNRNPA1  | FARSA    | ALOX15        |
| NCALD                | HNRPAB   | FBL      | ALX3          |
| D730039F16RIK        | HNRPK    | FDPS     | ARHGAP20      |
| RALGPS2              | HNRPL    | FGFR1    | ATAD4         |
| UNC13A               | PRMT1    | FH       | ATCAY         |
| CYP2D22              | HSPA9    | FUSIP1   | ATP1A3        |
| DNAJB10              | HSPE1    | G3BP1    | ATP2B2        |
| PRSS23               | IARS     | GARS     | AVP           |
| CTSG                 | ITGB4BP  | GART     | AY589791      |
| HDGFL1               | KIF11    | GEMIN6   | B230118H07RIK |
| A130006I12RIK        | KIF22    | GJA1     | B4GALNT2      |
| SNRPN                | KPNA2    | GLDC     | BAI3          |
| 2810439F02RIK        | KRAS     | GLO1     | BARHL1        |
| C77144               | RPSA     | GMNN     | BARHL2        |
| KLK1B27              | LMNB1    | GNA14    | BC021523      |
| TAL1                 | MAD2L1   | GNL3     | BC021891      |
| PVRL4                | MCM2     | GNPDA1   | BC032265      |

|                      |         |         |               |
|----------------------|---------|---------|---------------|
| CCL24                | MCM3    | HADH    | BC049655      |
| V2R13                | MCM4    | HAT1    | BC052055      |
| GCLC                 | MCM5    | HDAC1   | BC057022      |
| CNR1                 | MCM7    | HN1     | BC068157      |
| BC056474             | MSH2    | HNRNPA1 | BC072620      |
| OLFR870              | MYBL2   | HNRPAB  | BC100492      |
| RRAS                 | MYC     | HNRPK   | BCL6B         |
| VPREB1               | NAP1L1  | HNRPL   | BHLHB4        |
| TRAPPC2              | NASP    | HSPA14  | BMI1          |
| C81521               | NCL     | HSPA9   | BMP8B         |
| GABRB1 /// B230208N1 | NDUFA9  | HSPE1   | BSX           |
| LOC547109            | NDUFAB1 | IARS    | BTNL2         |
| ATP2A3               | NDUFB7  | IPO9    | C030014K22RIK |
| AI447904 /// BC09491 | NDUFB8  | ITGB4BP | C1QL2         |
| KLK1B11              | NDUFB10 | KIF20A  | C1QL4         |
| EFCBP2               | NDUFS2  | KIF4A   | C230078M08RIK |
| PEX7                 | RPL10A  | KPNA6   | C530028O21RIK |
| 9030617O03RIK        | NEK2    | KRAS    | C630004H02RIK |
| CILP2                | NME2    | LMNB1   | CACNA1E       |
| BMP15                | NME4    | LSM10   | CAR10         |
| SPAG6                | NOL1    | LSM2    | CBLN1         |
| GJB2                 | NONO    | LSM4    | CBX2          |
| PHACTR2              | NTHL1   | LSM5    | CCDC134       |
| LYPD1                | ORC1L   | LYPLA1  | CDK5R2        |
| STIM1                | OTX2    | MAPK13  | CDK6          |
| DAK                  | PA2G4   | MID1IP1 | CEACAM9       |
| MRGPRA3              | PRDX1   | MKI67IP | CELF3         |
| P2RX3                | PCNA    | MRPL11  | CELSR3        |
| REST /// LOC665152 / | PDCD2   | MRPL12  | CENTA1        |
| EMILIN3              | PDHA1   | MRPL13  | CENTA2        |
| GJB1                 | PHB     | MRPL15  | CHRNA4        |
| FUT1                 | PLK1    | MRPL16  | CILP2         |
| CHST3                | POLD1   | MRPL37  | CLDN5         |
| HTRA3                | POLE2   | MRPL39  | CLDN7         |
| TASP1                | POLR2F  | MRPL4   | CLEC4F        |
| EMP1                 | PPM1G   | MRPS17  | CLIC6         |
| STRBP                | PPP4C   | MRPS18B | CLM3          |
| ASAH2                | PRIM1   | MRPS2   | CN716893      |
| NIN                  | PRIM2   | MRPS28  | CNTFR         |
| BC019755             | MAPK13  | MRPS30  | COL2A1        |
| EDN1                 | PRPS1   | MRPS36  | CPNE6         |
| PCSK5                | PSMA5   | MRTO4   | CPNE7         |
| PCDHB11              | PSMA7   | MSH2    | CPNE9         |
| ZFP185               | PSMB5   | MTF2    | CPSF6         |
| DEFB15               | PSMB6   | MTHFD2  | CRHR2         |
| FAAH                 | RAD23B  | MYBL2   | CRTAC1        |

|                    |         |          |               |
|--------------------|---------|----------|---------------|
| CD209A             | RCN2    | MYC      | CRYBA2        |
| ZBTB16             | RFC3    | NCBP2    | CUTL2         |
| KLK1 /// KLK1B5    | RPA2    | NCL      | D11BWG0517E   |
| PLXDC1             | RPA3    | NDUFA11  | D630039A03RIK |
| TRIM26             | RPL13   | NDUFA9   | DBX1          |
| SGCA               | RPL22   | NDUFAB1  | DEFB3         |
| NFATC1             | RPL27A  | NDUFB10  | DES           |
| PHLDB2             | MRPL12  | NDUFB7   | DLL4          |
| TIGD5              | RPS3    | NDUFB8   | DLX4          |
| ADAM1A             | RPS5    | NDUFS2   | DMBX1         |
| ESM1 /// LOC632677 | RPS8    | NIP7     | DMRTC1B       |
| NOTCH1             | RPS12   | NIPSNAP1 | DMRTC1C       |
| H2-EB1             | RPS16   | NLN      | DOCK3         |
| PRUNE              | RPS19   | NME2     | DPP6          |
| DCTN6              | RPS23   | NME4     | DQ545486      |
| CCBL2              | RPS27   | NOL1     | DQ708880      |
| ELAC1              | RRM1    | NOLA2    | DRD5          |
| POP4               | RRM2    | NOLA3    | DSCAML1       |
| 5730494N06RIK      | SARS    | NONO     | DUOX2         |
| AVP                | SDHC    | NSBP1    | DUSP9         |
| FOXH1              | SDHD    | NT5DC2   | DXBAY18       |
| PPP1R3F            | SET     | NTHL1    | DYNLT1        |
| UBE2E3             | SLC2A1  | NUDCD2   | EBF2          |
| TOP3A              | SLC16A1 | NUP107   | ECEL1         |
| GPR12              | SNRPA   | OTX2     | ECGF1         |
| UPK3A              | SNRPA1  | PA2G4    | EEF1A2        |
| CLCA1 /// CLCA2    | SNRPD1  | PABPC1   | EG210155      |
| FYN                | SOX2    | PARP1    | EG331529      |
| 2210409E12RIK      | SQLE    | PDCD2    | EG434128      |
| PLA2R1             | SSB     | PDHA1    | EG434760      |
| DLX3               | SS18    | PDIA4    | EG434764      |
| TRPD52L3           | AURKA   | PDPN     | EG434797      |
| CD300LF            | TCF19   | PHC1     | EG545758      |
| TAS1R2             | TCOF1   | PHF5A    | EG546325      |
| CXCL13             | TERF1   | PIPOX    | EG630499      |
| ACTN1              | TGIF1   | PLK4     | EG667977      |
| PRKCC              | TOP2A   | POLR2F   | ELOVL2        |
| GFAP               | TP53    | POLR3K   | ELP           |
| AQP4               | TRIP6   | POP7     | EML2          |
| SMR2               | TTK     | PPM1G    | EMX1          |
| PCBD1              | U2AF1   | PPP4C    | EN2           |
| SOX10              | UBE2G1  | PRDX1    | EPHA10        |
| TMEM143            | UBE2V2  | PRMT1    | EPHA8         |
| DEFKR-RS10         | SUMO1   | PRMT3    | ESX1          |
| PROX1              | UGDH    | PROM1    | ETV2          |
| MTAP7              | UQCRH   | PRPS1    | F8A           |

|                      |          |          |               |
|----------------------|----------|----------|---------------|
| S100A5               | VBP1     | PSMA5    | FBXL16        |
| BC018285             | VRK1     | PSMA7    | FBXO2         |
| SCRN3                | WEE1     | PSMB5    | FCGR3         |
| C77609               | XPO1     | PSMB6    | FEV           |
| RESP18               | XRCC5    | PSMD14   | FEZF1         |
| C1QL1                | YY1      | PSME3    | FEZF2         |
| CTRB1                | ZIC3     | PUS1     | FGF14         |
| VPS37A               | ZNF22    | RAB34    | FGF21         |
| 6330442E10RIK        | DAP3     | RACGAP1  | FGF3          |
| ACTL7A               | DEK      | RAD18    | FNDC5         |
| CLDN16               | CLPP     | RAD23B   | FOXA2         |
| PGA5                 | CDC7     | RCN2     | FOXB1         |
| PLK2                 | TEAD2    | RNPS1    | FOXB2         |
| PGC                  | SIP1     | RPA2     | FOXD1         |
| LOC666466            | NIPSNAP1 | RPL10A   | FOXD3         |
| HOD                  | HAT1     | RPL13    | FOXI2         |
| PARD6G               | TMEFF1   | RPL22    | FXYD1         |
| TM6SF2               | RUVBL1   | RPL27A   | FXYD7         |
| SLC6A13              | EIF3S10  | RPP40    | G630014P10RIK |
| CAMK4                | EIF3S2   | RPS12    | GAD1          |
| IL24                 | BANF1    | RPS16    | GALNTL1       |
| C630004H02RIK        | PROM1    | RPS19    | GCGR          |
| DIRAS1               | DDX18    | RPS23    | GDAP2         |
| ACTL7B               | EIF2S2   | RPS27    | GDF10         |
| A2M /// LOC677369    | CCNB2    | RPS3     | GDF6          |
| TCP11                | EXO1     | RPS5     | GDF7          |
| NID1 /// LOC630776   | BUB3     | RPS8     | GFI1          |
| 4930429B21RIK        | AURKB    | RPSA     | GFRA4         |
| CLDN13               | TRIP13   | RUVBL2   | GHSR          |
| SCUBE2               | WDR57    | SARS     | GJB1          |
| EVI2B                | KIF23    | SDHC     | GLIS2         |
| C76614               | EEF1E1   | SDHD     | GM996         |
| BC021614             | PDIA4    | SEPHS2   | GPR120        |
| NXPH3                | GNA14    | SERPINH1 | GPR162        |
| FGFR4                | DLG7     | SIP1     | GPR26         |
| GALNTL1              | NCAPD2   | SLC16A1  | GRHL3         |
| CDKN2B               | GNPDA1   | SLC25A5  | GRID1         |
| GPR50                | CHAF1A   | SLC2A1   | GRID2IP       |
| IFNA1                | SMC4     | SNRPA    | GRIN1         |
| MMP2                 | DPP3     | SNRPA1   | H2-B2         |
| MUP5                 | KIF20A   | SNRPD1   | H2-BL         |
| PDCD1LG2             | G3BP1    | SNX5     | H2-K1         |
| LAPTM5 /// LOC669058 | PRMT3    | SOX2     | H2-Q1         |
| C530044N13RIK        | PSME3    | SQLE     | H2-Q10        |
| NID1                 | PSMD14   | SS18     | H2-Q2         |
| EN1                  | POP7     | SSB      | H2-Q6         |

|                     |          |        |         |
|---------------------|----------|--------|---------|
| PRAP1               | COX4NB   | STIP1  | H2-Q7   |
| OPN4                | NDC80    | STOML2 | H2-Q8   |
| 2210415F13RIK       | YAP1     | SUMO1  | H2-T10  |
| CYP2G1P             | LYPLA1   | TCF19  | H2-T22  |
| YIPF7               | TIMM44   | TCF7L1 | H2-T23  |
| TRP63               | SMC2     | TCOF1  | H2AFZ   |
| CACNB1              | SPAG5    | TEAD2  | HAPLN4  |
| HSD3B3              | PDPN     | TGIF1  | HBA-A2  |
| PRP15               | PLK4     | TGIF2  | HBA-X   |
| RPS6KL1             | FUSIP1   | THOC3  | HFE2    |
| CITED1              | MTHFD2   | TIMM13 | HINT2   |
| TMPRSS13            | RPP40    | TIMM44 | HMX2    |
| MAST1               | RUVBL2   | TIMM8A | HNF1B   |
| ATXN10              | MRPS30   | TIMM8B | HOXB1   |
| OLFR544             | RNPS1    | TMEFF1 | HOXB13  |
| ADPRH               | DBF4     | TP53   | HOXB6   |
| 4930432F04RIK       | ERP29    | TRIP13 | HOXB8   |
| AHDC1               | STIP1    | TRIP6  | HOXB9   |
| 4930544G11RIK       | EBNA1BP2 | U2AF1  | HOXC10  |
| SLC17A3             | UQCR     | UBE2G1 | HOXC11  |
| MLXIPL              | WDHD1    | UBE2V2 | HOXC12  |
| GHRH                | CHEK2    | UGDH   | HOXC8   |
| IL20                | CBX3     | UQCR   | HOXC9   |
| PCX                 | MTF2     | UQCRH  | HOXD1   |
| 1810022C23RIK       | NCBP2    | UTP18  | HPCAL4  |
| MMP14               | SEPHS2   | VBP1   | HTR5A   |
| PDZX                | CCT5     | VRK1   | HTRA3   |
| AW049829            | EXOSC7   | WBP11  | HUNK    |
| CPE /// LOC677374   | NCAPH    | WDHD1  | IFNA6   |
| TCL1B3              | KPNA6    | WDR57  | IFNK    |
| D11ERTD326E         | LSM5     | WDR77  | IGSF21  |
| CENTG1              | GSPT2    | XPO1   | IL11RA2 |
| PAX4                | KIF4A    | XRCC5  | IL20    |
| ANKRD13A            | LSM4     | YAP1   | INSL3   |
| HIF3A /// LOC641092 | GNL3     | YY1    | INSM1   |
| CAR9                | TIMM13   | ZCD1   | IQSEC3  |
| 3110079O15RIK       | TIMM8B   | ZIC3   | IRX4    |
| RAB6A               | CKAP2    | ZNF22  | ISLR2   |
| BC019537            | PABPC1   |        | JAG2    |
| RPS6                | ACAD8    |        | KAZALD1 |
| SLC8A1              | SNX5     |        | KBTBD11 |
| PRDM5               | EIF3S12  |        | KCNA5   |
| SLC30A3             | MRPS28   |        | KCNC4   |
| 6330505N24RIK       | MRPS18B  |        | KCNH8   |
| PHF7                | MRPL13   |        | KCNIP3  |
| ZFPN1A1             | MRPL15   |        | KCNJ12  |

|                      |          |              |
|----------------------|----------|--------------|
| KCNMA1               | RACGAP1  | KCNJ4        |
| 1810065E05RIK        | STOML2   | KCNK12       |
| IGH-VJ558 /// LOC238 | GMNN     | KCNK9        |
| PILRB                | MRPL4    | KCNQ2        |
| BRWD3                | UTP18    | KCNQ4        |
| MGC107702            | MRPS2    | KCNS2        |
| CAMTA2               | MRT04    | KCTD19       |
| CXCL11               | HN1      | KIRREL2      |
| 4930511J11RIK        | HSPA14   | KLK1B21      |
| LHX3                 | NUSAP1   | KLK1B24      |
| GPR87                | MRPL37   | KLK4         |
| C86187               | PIPOX    | KLRE1        |
| CDKN2A               | MRPS17   | KNDC1        |
| LCN8                 | EIF3S6IP | KRT1         |
| AI465270             | NIP7     | KRT6A        |
| C79709               | AMOTL2   | KRT6B        |
| MSI1                 | GTSE1    | KRT71        |
| PTPN6                | DTL      | KRT77        |
| 3110003A17RIK        | POLR3K   | KRT83        |
| NRARP                | WBP11    | KRT86        |
| TXNIP                | COQ3     | KRTAP5-1     |
| 4930403L05RIK        | MRPL39   | KRTAP5-2     |
| TMEM45B              | CYCS     | KRTAP5-4     |
| STX6                 | ERCC6L   | KRTAP5-5     |
| ACOT3                | MRPL16   | LAD1         |
| SLC2A5               | CDCA8    | LBX2         |
| EPHA6                | DARS2    | LBXCOR1      |
| ALLC                 | BXDC2    | LEFTY1       |
| KCNMB2               | NOLA3    | LHX1         |
| DPYSL5               | NOLA2    | LHX5         |
| GATM                 | IPO9     | LHX6         |
| EGR4                 | ZCD1     | LINGO4       |
| ICOS                 | RCC2     | LOC100036766 |
| HOXC8                | RAD18    | LOC100039913 |
| KRTAP12-1            | NUP107   | LOC100039948 |
| MUC5AC               | NLN      | LOC100040635 |
| GBP1                 | LSM2     | LOC100042555 |
| ARRDC4               | FAM60A   | LOC100043125 |
| FOLH1                | MID1IP1  | LOC621852    |
| ITGB2L               | TGIF2    | LOC625638    |
| HBB-BH1              | NT5DC2   | LRFN2        |
| CPE                  | MRPL11   | LRG1         |
| CHIC1                | ELOVL6   | LY6H         |
| RUSC1                | C11orf48 | LYRM2        |
| MCPT1                | WDR77    | MAFB         |
| XPNPEP2              | NSBP1    | MAPK15       |

PDE4A  
RNF144  
CCR1L1  
IL18BP  
C77681  
LOC622147 /// ENV //  
BCL7A  
MPO  
EDA  
GUP1  
GDF9  
YPEL5  
ZFP697  
BMP10  
DNAHC8  
ALK  
AF366264  
PPP1CB  
TAT  
GIMAP3P  
MAGEA1 /// MAGEA5  
OLFR65 /// OLFR66  
SNCB  
PMFBP1  
SPNB3  
OTT /// LOC434863 //  
EDEM1  
REG1  
1700024D23RIK  
CDX2  
SLC27A1  
CLEC1B  
CCNG1  
ELOVL3  
CYP19A1  
CALB2  
AA517864  
OTOG  
ELA3A  
ST8SIA2  
ANKRD24  
PLEK  
8430406I07RIK  
KRT2-19  
GPR23  
1700011A15RIK

C2orf47  
GEMIN6  
PUS1  
ANP32E  
TCF7L1  
CDCA3  
RAB34  
CDCA7  
THOC3  
MKI67IP  
PHF5A  
FAM136A  
LSM10  
MRPS36  
CDCA5  
CCDC5  
NDUFA11  
NUDCD2

MAST1  
MCHR1  
MGAT5B  
MKIAA1180  
MMP24  
MMP9  
MRAS  
MSI1  
NAGS  
NCAN  
NEFH  
NEUROG1  
NFASC  
NKX-1.2  
NKX2-2  
NKX2-3  
NKX2-5  
NKX6-1  
NMNAT2  
NODAL  
NOL3  
NOVA2  
NPHS1  
NPHS2  
NPTX1  
NR0B1  
NRXN2  
NR\_003248  
NTF5  
NTSR2  
OLFR1018  
OLFR1087  
OLFR12  
OLFR1286  
OLFR399  
OLFR853  
OLFR95  
OLIG2  
OLIG3  
ONECUT3  
OPRD1  
OSBP2  
OTOP1  
OTOP2  
OTP  
OTTMUSG00000016790

AI661453  
CACNG4  
MRGPRA2 /// LOC66872  
CACNB4  
GRIN1  
2310057J18RIK /// 23  
ENTPD2  
CENTD1  
MEP1A  
CLCA1  
PROC  
SLC35A2  
SPRRL3  
LCN3  
HOXC4  
B3GAT1  
GP1BB  
MAL  
MEP1B  
1700019N12RIK  
HIF3A  
SERPINA3A  
SLCO1C1  
MAN2B1  
SYN1  
4631403P03RIK  
TAP1  
3110001I20RIK  
TNRC15  
SIM1  
MPP3  
EXOSC9  
EPB4.2  
PRKCQ  
CASP4  
LNX1  
ATP2A1  
KRTAP5-5  
T  
GCGR  
SLC22A17  
SCUBE1  
OSTA  
UTS2R  
FUT10  
GALR1

OTTMUSG0000001715  
OTTMUSG0000001715  
OXCT2A  
OXCT2B  
OXT  
PACSIN1  
PAX2  
PAX4  
PAX6  
PAX7  
PDE2A  
PDX1  
PEA15B  
PGR  
PHOX2A  
PITX1  
PITX2  
PJA1  
PKHD1L1  
PLCB2  
PLD4  
PLXNB3  
PNMT  
POU4F2  
POU4F3  
PPP1R1B  
PPP1R2  
PRDM8  
PRKCQ  
PRLHR  
PRPH  
PSD  
PSD2  
PSORS1C2  
PTCHD2  
PTF1A  
PVALB  
PYY  
QRICH2  
RAD9  
RAET1E  
RASGRP2  
RBM28  
RBPJL  
RFX4  
RGS14



OLFR480  
FFAR2  
ZP2  
SLC37A2  
A930031D07RIK  
APOC3  
KIF12  
HAMP1  
LRRC18  
STK10  
BAT4  
KRTAP6-1  
SMYD1  
B3GALT1  
GATA1  
TMBIM1  
TXNL6  
GPRC6A  
LMOD2  
BMI1  
TPO  
DARC  
GADD45GIP1  
2810423E13RIK  
GPRC5C  
ITGA2  
MYOZ1  
HRG  
SLC12A1  
GALR2  
H2-AB1  
LOC633640  
ENTPD4  
HIST1H1T  
TMEM12  
ART1  
GFI1B  
SEMA6D  
AY026312  
CYP2C55  
ACTB  
D730048I06RIK  
SULT5A1  
PSKH1  
TMEM66  
TACR3

RGS3  
RHOX2  
RHOX3  
RHOX4A  
RHOX4B  
RHOX4C  
RHOX4D  
RHOX4E  
RHOX4G  
RHOX4H  
RNF39  
RPRML  
RRS1  
RTBDN  
RTN4RL1  
RTN4RL2  
RUNX3  
SALL4  
SCNN1A  
SCRT1  
SEMA6D  
SEZ6  
SEZ6L  
SEZ6L2  
SFRP5  
SHD  
SHE  
SHH  
SHMT2  
SHROOM4  
SIM1  
SIX3  
SLC17A6  
SLC17A7  
SLC22A12  
SLC22A3  
SLC30A3  
SLC32A1  
SLC5A11  
SLC6A1  
SLC6A11  
SLC6A2  
SLC6A7  
SLC9A7  
SMOC1  
SMUG1

SERPINB9C  
RSAD2  
CSF2RB1 /// CSF2RB2  
GALC  
LNX2  
AFM  
NDRG4  
TESP1  
ZAN  
SLC45A2  
PNPO  
CXCL12  
1810010M01RIK  
CML2  
BPIL1  
GSTM3  
PHYHIPL  
CMAR  
4931440B09RIK  
DEF8  
NCAM1  
LY9  
4921530L21RIK  
MYO1G  
SELPL  
MAGEA7  
GPLD1  
2310007H09RIK  
ATP4A  
KCNIP4  
C330011F01RIK /// 64  
PRLPC3  
TNC  
CYP2J13  
6720475J19RIK /// LO  
GTPBP2  
BC014805  
PTGDR  
ESCO1  
CD6  
SPOCK1  
ACOT12  
GPR45  
LARGE  
NR4A3  
EDG6

SORCS3  
SOX1  
SP9  
SPEG  
SPG7  
SPNB1  
SRD5A2  
STMN3  
SUPT4H2  
SYTL2  
TAL1  
TAS2R119  
TBX1  
TBX21  
TCF15  
TCF21  
TCFAP2D  
TFAM  
THSD7B  
TIFP39  
TLX1  
TLX3  
TMEM35  
TMEM91  
TNF  
TRO  
TTC22  
TUBB4  
TUFM  
TYRO3  
UCN  
UNC5A  
UNCX4.1  
USP30  
USP37  
USP44  
VAX1  
WIZ  
WNT3A  
X57330  
XKR7  
XLR3A  
XLR3B  
XLR3C  
XLR4A  
XLR4B

VGLL1  
FANK1  
GFRA2  
GUCA1B  
HCN3  
PLEKHF1  
ROS1  
1810009J06RIK  
IFNA2  
ZDHHC14  
TMEM144  
C130026I21RIK /// LO  
SPON1  
DKK1  
OXT  
C78513  
OMG  
INSL3 /// JAK3  
TRIM30 /// AI451617  
ADORA2A  
KLK1B21  
CPZ  
AI428795  
SEMA6C  
CDKN3  
PRLR  
CD33  
PAX8  
4930521E07RIK  
CFC1  
CXCR3  
2810402A17RIK  
GPR83  
MYO9A  
INSM1  
SCNN1A  
PHGDH /// LOC668771  
UPK2  
AW112010  
IDE  
D13ERTD608E  
1110008H02RIK  
MRPL19  
PFPL  
KCNA7  
SPSB3

XLR4C  
XLR5A  
XLR5C  
ZAR1  
ZDHHC22  
ZIC3  
ZIC5

SEMA7A  
SCOC  
HPD  
APOBEC3  
PDRG1  
LAO1  
CRHR2  
CTRC  
CML4  
ABCB4  
EYA3  
LOC638575  
CIDEB  
BC027072  
COG1  
FPR-RS4  
SCN11A  
DPF3  
TTR  
ACSM2  
ASAH1  
HEBP1  
GDF2  
C4B /// LOC675521  
PAPSS2  
EDAR /// LOC669001





























**H3K27 Targets in Snf5Up in Ezh2-deficient MEFs****This Study****968**

0610012D14RIK  
 1110017D15RIK  
 1110061O04RIK  
 1190003M12RIK  
 1190020J12RIK  
 1200009O22RIK  
 1300007F04RIK  
 1700008P20RIK  
 1700023F06RIK  
 1700031F05RIK  
 1700041B01RIK  
 1700113I22RIK  
 2010001J22RIK  
 2010001M09RIK  
 2310031A18RIK  
 2410004A20RIK  
 2810451A06RIK  
 2810459M11RIK  
 3110035E14RIK  
 4632411J06RIK  
 4632425D07RIK  
 4921530D09RIK  
 4930449I24RIK  
 4930511J11RIK  
 4930558O21RIK  
 4930563P21RIK  
 5031410I06RIK  
 5730508B09RIK  
 6330403A02RIK  
 6330514A18RIK  
 6430550H21RIK  
 8430427H17RIK  
 9430028L06RIK  
 A130092J06RIK  
 A230054D04RIK  
 A230079K17RIK  
 A2BP1  
 A530064D06RIK  
 A530088E08RIK  
 A830053O21RIK  
 A930001M12RIK

**This Study****85**

2700007P21RIK  
 5730494N06RIK  
 ANKRD1  
 ANXA4  
 ARAP2  
 ARL5A  
 ASAH1  
 ASAH2  
 CD55  
 CDH2  
 CDKN2A  
 CLCA1  
 COMMD9  
 CRIM1  
 CTLA2A  
 CXCL12  
 CYP1B1  
 D0H4S114  
 DCTN6  
 DES  
 EMP1  
 ENO2  
 ENTPD4  
 ERGIC1  
 ESCO1  
 EXOSC9  
 FAM126A  
 FHDC1  
 GABRB1  
 GADD45GIP1  
 GALC  
 GM7120  
 GPR137B  
 GREM1  
 HEBP1  
 HGSNAT  
 HIST1H4I  
 HMOX1  
 IDE  
 KIF5B  
 KLF9

**Random set of ref Non H3K27m****This Study****132**

1600014C10RIK  
 1700001F09RIK  
 1700019G17RIK  
 1700034I23RIK  
 2510027J23RIK  
 2610034M16RIK  
 4933421I07RIK  
 ABCA4  
 ACOT5  
 AEBP2  
 AI118078  
 ALDH1A3  
 API5  
 ASTN2  
 ATP1B2  
 BHMT  
 BIN1  
 BST1  
 C8A  
 CABP4  
 CAMKV  
 CAPZA3  
 CATSPERG1  
 CBLN1  
 CCDC28A  
 CCL6  
 CD1D2  
 CD207  
 CD74  
 CER1  
 CHI3L1  
 CHRDL1  
 CHRNE  
 CPSF3  
 CST11  
 CTSL3  
 CYLC1  
 CYP7A1  
 DACH1  
 DCLRE1B  
 DEFB8

**This Study****382**

DCN  
 DCP1A  
 DCPS  
 DCTN1  
 DCTN2  
 DCTN3  
 DCTN4  
 DCTN5  
 DCTN6  
 DCTPP1  
 DCUN1D1  
 DCUN1D5  
 DCXR  
 DDA1  
 DDAH2  
 DDB1  
 DDC  
 DDHD2  
 DDI2  
 DDIT3  
 DDIT4  
 DDIT4L  
 DDOST  
 DDR1  
 DDR2  
 DDRGK1  
 DDT  
 DDX1  
 DDX10  
 DDX18  
 DDX19A  
 DDX19B  
 DDX20  
 DDX21  
 DDX24  
 DDX26B  
 DDX27  
 DDX39  
 DDX3X  
 DDX3Y  
 DDX41

|          |         |          |         |
|----------|---------|----------|---------|
| AAAS     | LIMA1   | DNM1L    | DDX42   |
| AB041550 | MAN2B1  | DUSP9    | DDX46   |
| AB080658 | MANBA   | EBI3     | DDX47   |
| ABCA6    | MAOA    | EEF1D    | DDX5    |
| ABCD2    | MCCC1   | EPX      | DDX50   |
| ABHD7    | MEIS2   | ERCC2    | DDX51   |
| ACCN1    | MGLL    | F2RL3    | DDX52   |
| ACCN4    | MMP2    | FCHSD1   | DDX54   |
| ACOT1    | MRPL19  | FGF8     | DDX56   |
| ACOT4    | MT1     | FOXD2    | DDX59   |
| ACOT5    | NAB1    | FRAT1    | DDX6    |
| ACP1     | NCAM1   | GABRG1   | DEB1    |
| ADAM3    | NID1    | GDAP1    | DECR1   |
| ADCY8    | NNAT    | GLCC11   | DECR2   |
| ADCYAP1  | NOTCH1  | GRHL1    | DEDD    |
| ADD2     | NOTCH3  | GTPBP5   | DEF8    |
| ADRA2A   | NUB1    | HES2     | DEGS1   |
| ADRA2B   | ODZ3    | HIF1A    | DEK     |
| ADRA2C   | OLR1    | HPCA     | DENND4B |
| ADRB1    | PAPSS2  | HPGD     | DENND4C |
| ADRB3    | PDPN    | HPN      | DENND5A |
| AF060570 | PLAGL1  | IFNG     | DENR    |
| AF529169 | PLEKHF1 | IL12RB2  | DEPDC1A |
| AI464131 | POP4    | IMP4     | DEPDC7  |
| AI593442 | PRDX2   | IRF4     | DERA    |
| AI595406 | PRSS23  | IRS2     | DERL1   |
| AI836003 | RIOK3   | KCNC1    | DERL2   |
| AJAP1    | RNF128  | KCNC4    | DES     |
| AK002860 | SCOC    | KCNIP1   | DEXI    |
| AK003800 | SCPEP1  | KCNS1    | DFFA    |
| AK008705 | SDC4    | KLRA2    | DFFB    |
| AK008755 | SEMA3E  | LBX1     | DGAT1   |
| AK011684 | SFN     | LENEP    | DGAT2   |
| AK012214 | SFRS14  | MAP2K2   | DGCR14  |
| AK012595 | SH3RF1  | MAPK8IP2 | DGCR2   |
| AK014786 | SORBS1  | MECP2    | DGCR6   |
| AK017182 | SPSB1   | MYCN     | DGKA    |
| AK018772 | TGFB2   | MYH6     | DGKQ    |
| AK020867 | THBD    | NANOS1   | DGKZ    |
| AK028383 | TM2D2   | NEFH     | DGUOK   |
| AK029605 | TMEM66  | NPY2R    | DHCR24  |
| AK031498 | TTC28   | NR0B2    | DHCR7   |
| AK033147 | TXNIP   | NTNG2    | DHDDS   |
| AK033378 | UPF1    | OLIG2    | DHFR    |
| AK033508 |         | OLIG3    | DHODH   |
| AK035754 |         | PET112L  | DHPS    |

|          |           |        |
|----------|-----------|--------|
| AK036843 | PIGQ      | DHRS1  |
| AK037113 | PLA2G1B   | DHRS11 |
| AK039020 | PPARGC1B  | DHRS3  |
| AK039417 | PPP1R3C   | DHRS4  |
| AK041755 | PRM3      | DHRS7B |
| AK042354 | PRSS44    | DHX15  |
| AK043747 | PTH       | DHX16  |
| AK044313 | RASAL3    | DHX30  |
| AK046385 | RHBDD3    | DHX32  |
| AK047857 | RPTN      | DHX36  |
| AK048292 | SAPS2     | DHX40  |
| AK048672 | SCGB1A1   | DHX57  |
| AK053193 | SEMA6A    | DHX8   |
| AK053418 | SERPINB6C | DHX9   |
| AK076389 | SGCG      | DIABLO |
| AK080352 | SH3GL3    | DIAP1  |
| AK082731 | SIX4      | DIAP2  |
| AK086290 | SLC13A1   | DIAP3  |
| AK087264 | SLC22A18  | DICER1 |
| AK132077 | SLC3A1    | DIDO1  |
| AK132490 | SLC6A12   | DIMT1  |
| AK132940 | SLIT1     | DIP2B  |
| AK134637 | SRGAP1    | DIS3   |
| AK138592 | SSTR1     | DKK2   |
| AK139319 | STAM2     | DKK3   |
| AK139461 | STEAP4    | DLAT   |
| AK142058 | SUSD2     | DLD    |
| AK142074 | SVS5      | DLG1   |
| AK144266 | TLR6      | DLG3   |
| AK144536 | TMEM45B   | DLG4   |
| AK145180 | TMPRSS11D | DLG5   |
| AK146255 | TMPRSS4   | DLGAP4 |
| AK157941 | TNNI2     | DLGAP5 |
| AK161769 | TSHB      | DLK1   |
| AK165089 | TTL       | DLK2   |
| AK172459 | UCHL4     | DLST   |
| AK205032 | UGT2B34   | DLX2   |
| AKP2     | V1RA1     | DMAP1  |
| ALG13    | V1RC6     | DMD    |
| ALOX12   | V1RD3     | DMPK   |
| ALOX12B  | YPEL1     | DMTF1  |
| ALOX15   | ZC3H3     | DMXL1  |
| ALOX5    | ZFP106    | DNA2   |
| ALOX8    | ZFP287    | DNAJA1 |
| ALPK3    | ZFYVE27   | DNAJA2 |
| ALX3     |           | DNAJA3 |

ALX4  
AMMECR1  
ANK2  
ANKRD43  
ANKRD56  
ANKRD58  
ANXA2  
APOA4  
AQP5  
ARR3  
ASB14  
ASCL1  
ASS1  
ASTN2  
ATOH1  
ATP1B3  
ATP6V1C2  
AU023871  
AW049604  
AY589791  
B3GAT1  
B3GAT2  
B430119L13RIK  
B4GALNT2  
BAAT  
BAI2  
BARHL1  
BARX1  
BARX2  
BC024997  
BC028663  
BC033915  
BC035537  
BC049655  
BC049702  
BC050972  
BC052055  
BC057022  
BC057079  
BC058988  
BC068157  
BC089491  
BCAN  
BEX1  
BEX4  
BHLHB4

DNAJA4  
DNAJB1  
DNAJB11  
DNAJB12  
DNAJB2  
DNAJB4  
DNAJB5  
DNAJB6  
DNAJB9  
DNAJC1  
DNAJC10  
DNAJC11  
DNAJC12  
DNAJC13  
DNAJC14  
DNAJC15  
DNAJC18  
DNAJC19  
DNAJC2  
DNAJC21  
DNAJC24  
DNAJC28  
DNAJC3  
DNAJC30  
DNAJC4  
DNAJC5  
DNAJC7  
DNAJC8  
DNAJC9  
DNALC4  
DNER  
DNLZ  
DNM1  
DNM1L  
DNM2  
DNM3  
DNM3OS  
DNMT1  
DNPEP  
DNMTTIP1  
DNMTTIP2  
DOCK1  
DOCK5  
DOCK7  
DOCK9  
DOHH

BHLHB5  
BMP7  
BMP8B  
BRSK2  
BSX  
BTNL2  
C030019F02RIK  
C130032J12RIK  
C130038G02RIK  
C1QL1  
C1QL2  
C1QL4  
C230094A16RIK  
C330005M16RIK  
C530028O21RIK  
C630004H02RIK  
C79127  
CABP7  
CACNA1B  
CACNA1E  
CADPS  
CALCR  
CAMK2B  
CAMK2N1  
CAMKV  
CAR1  
CAR10  
CAR4  
CAR7  
CASR  
CBLN1  
CBLN4  
CBS  
CCDC108  
CCKBR  
CCL27  
CCNDBP1  
CD300C  
CD300LG  
CDH8  
CDK5R1  
CDK5R2  
CDK6  
CDX2  
CECR6  
CELSR3

DOK1  
DOLK  
DOLPP1  
DOM3Z  
DONSON  
DOPEY2  
DOS  
DPAGT1  
DPCD  
DPF2  
DPH1  
DPH2  
DPH5  
DPM2  
DPP3  
DPP7  
DPP8  
DPT  
DPY30  
DPYSL3  
DR1  
DRAM1  
DRAP1  
DRD3  
DRG1  
DRG2  
DSC1  
DSCR3  
DSG2  
DSN1  
DSP  
DST  
DSTN  
DSTYK  
DTD1  
DTNA  
DTNBP1  
DTWD1  
DTX2  
DTX3  
DTYMK  
DULLARD  
DUS1L  
DUS3L  
DUSP1  
DUSP10

CEP70  
CHL1  
CHRM4  
CHST8  
CIDEA  
CILP2  
CLCN2  
CLDN3  
CLDN5  
CLDN7  
CLIC6  
CLIP3  
CNIH3  
CNTFR  
CNTN2  
COBL  
COL13A1  
COL15A1  
COL2A1  
COL9A3  
COMP  
CORL2  
COTL1  
CPLX1  
CPLX3  
CPNE7  
CPNE9  
CRBN  
CRHR2  
CRIP1  
CRMP1  
CRTAC1  
CRYAA  
CSMD1  
CTTNBP2NL  
CUTL2  
CXCL14  
CXX1A  
CYGB  
CYP24A1  
CYP27B1  
D11BWG0517E  
D930017K21RIK  
DAB1  
DBX1  
DCPP2

DUSP11  
DUSP12  
DUSP14  
DUSP16  
DUSP18  
DUSP19  
DUSP22  
DUSP3  
DUSP6  
DUSP7  
DUSP8  
DUT  
DVL1  
DVL2  
DYNC1H1  
DYNC1I2  
DYNC1LI1  
DYNLL1  
DYNLL2  
DYNLRB1  
DYNLT3  
DYRK1A  
DYSF  
DZIP1  
E130112L23RIK  
E130303B06RIK  
E130309D02RIK  
E2F1  
E2F3  
E2F4  
E2F5  
E2F6  
E330009J07RIK  
E430028B21RIK  
E4F1  
EAF2  
EAPP  
EBAG9  
EBF1  
EBF3  
EBNA1BP2  
EBP  
EBPL  
ECD  
ECE1  
ECE2

DCPP3  
DCTN1  
DEFB21  
DIO3  
DLGAP2  
DLL4  
DLX2  
DLX3  
DMBX1  
DMRT1  
DMRT3  
DMRTA1  
DMRTC1C  
DNAHC12  
DNAJC6  
DOC2A  
DPP10  
DPYSL5  
DQ688833  
DRD2  
DRP2  
DSCAML1  
DTX1  
DUOX1  
DUOX2  
DUSP9  
DXBAY18  
DYNLT1  
E130018O15RIK  
E330034G19RIK  
EBF2  
EBF3  
EBF4  
ECEL1  
EDG8  
EEF1A2  
EFHD1  
EG243628  
EG331529  
EG385328  
EG434128  
EG434280  
EG434727  
EG434760  
EG434764  
EG434797

ECH1  
ECHDC1  
ECHDC2  
ECHS1  
ECM1  
ECSIT  
ECT2  
EDC4  
EDEM1  
EDEM2  
EDEM3  
EDF1  
EDIL3  
EDN1  
EDNRB  
EEA1  
EED  
EEF1A1  
EEF1B2  
EEF1D  
EEF1G  
EEF2  
EEF2K  
EEFSEC  
EFCAB7  
EFEMP1  
EFEMP2  
EFHD2  
EFNA3  
EFNB1  
EFNB2  
EFR3A  
EFS  
EFTUD1  
EFTUD2  
EG546165  
EG627427  
EG627782  
EG665955  
EG668525  
EGF  
EGFL7  
EGFR  
EGLN1  
EGLN2  
EGLN3

EG545758  
EG546325  
EG626615  
EG627814  
EG630499  
EG667977  
EGR3  
EIF1AY  
ELP  
EMID2  
EMILIN3  
EMX1  
EN2  
EPHA10  
EPHA6  
EPHA8  
EPHB1  
ESPN  
EXTL1  
F13B  
FABP2  
FAT2  
FBXW4  
FBXW7  
FEV  
FEZ2  
FEZF1  
FEZF2  
FGF11  
FGF20  
FGF3  
FGF4  
FGF8  
FLAD1  
FMN2  
FNDC3B  
FOXA1  
FOXA2  
FOXA3  
FOXB1  
FOXC1  
FOXD1  
FOXD2  
FOXD3  
FOXD4  
FOXE1

EGR1  
EHBP1  
EHBP1L1  
EHD1  
EHD2  
EHD3  
EHD4  
EHMT2  
EI24  
EID1  
EIF1  
EIF1A  
EIF1AY  
EIF1B  
EIF2AK1  
EIF2AK2  
EIF2AK3  
EIF2AK4  
EIF2B1  
EIF2B2  
EIF2B4  
EIF2B5  
EIF2C2  
EIF2S1  
EIF2S2  
EIF2S3X  
EIF2S3Y  
EIF3A  
EIF3B  
EIF3C  
EIF3D  
EIF3E  
EIF3F  
EIF3G  
EIF3H  
EIF3I  
EIF3J  
EIF3K  
EIF3L  
EIF3M  
EIF4A1  
EIF4A2  
EIF4A3  
EIF4B  
EIF4E  
EIF4E3



FOXE3  
FOXF1A  
FOXL2  
FOXN4  
FRMD5  
FRS2  
FSTL4  
FUT1  
G630014P10RIK  
GABRD  
GAD1  
GAD2  
GALNT11  
GALNT9  
GALNTL1  
GALP  
GALR1  
GALR2  
GATA2  
GATA4  
GATA5  
GBX1  
GBX2  
GC  
GCGR  
GDF7  
GF11  
GFRA3  
GJB1  
GLDN  
GLP1R  
GM266  
GM996  
GNA11  
GNG13  
GNS  
GPC3  
GPR1  
GPR101  
GPR103  
GPR120  
GPR139  
GPR26  
GPR27  
GPR37  
GPR50

EIF4EBP1  
EIF4EBP2  
EIF4G1  
EIF4G2  
EIF4G3  
EIF4H  
EIF5  
EIF5A  
EIF5B  
EIF6  
ELAC1  
ELAC2  
ELAVL1  
ELAVL2  
ELF1  
ELF2  
ELK1  
ELK3  
ELK4

GPR6  
GPR88  
GRHL2  
GRIA2  
GRID1  
GRID2IP  
GRIN2A  
GRM1  
GRM2  
GRM7  
GRP  
GRRP1  
GSX1  
GSX2  
H2-B2  
H2-BL  
H2-GS14  
H2-K1  
H2-Q1  
H2-Q10  
H2-Q2  
H2-Q6  
H2-Q7  
H2-Q8  
H2-T10  
H2-T22  
H2-T23  
H2-T3-LIKE  
H28  
HAND1  
HAP1  
HBA-A2  
HCK  
HCN4  
HCRTR1  
HELT  
HES2  
HES3  
HES5  
HMX1  
HMX2  
HOXA1  
HOXB1  
HOXB13  
HOXB3  
HOXB6

HOXB7  
HOXC11  
HOXC12  
HOXC8  
HOXC9  
HOXD1  
HOXD10  
HOXD11  
HOXD13  
HS3ST6  
HSPA2  
HTR1A  
HTR1D  
HTR4  
HTR5A  
HTR6  
ICOS  
IFNA1  
IFNA12  
IFNA5  
IFNA6  
IGFBPL1  
IGSF21  
IHH  
IKZF1  
IL11RA2  
INHBB  
INSL3  
INSL6  
INSM1  
INSM2  
INSRR  
IRF5  
IRS4  
ISLR2  
ITGA3  
ITPKA  
JAG2  
JPH3  
KAZALD1  
KBTBD11  
KCNA2  
KCNA5  
KCNA6  
KCNC1  
KCNC2

KCNC3  
KCNG3  
KCNH3  
KCNH5  
KCNJ10  
KCNJ3  
KCNJ9  
KCNK1  
KCNK13  
KCNK9  
KCNMA1  
KCNN2  
KCNQ2  
KCNS2  
KCTD19  
KIAA0196  
KIF3C  
KIF4  
KIRREL2  
KISS1R  
KLK1B24  
KLK1B4  
KLK1B8  
KRT1  
KRT73  
KRT81  
KRT83  
KRTAP5-1  
KRTAP5-2  
KRTAP5-4  
KRTAP5-5  
KRTAP8-2  
LAMC3  
LBX1  
LBX2  
LBXCOR1  
LEFTY1  
LEFTY2  
LHFPL4  
LHX1  
LHX3  
LHX5  
LIN28  
LIN7A  
LMX1A  
LOC100036766

LOC100039913  
LOC100039948  
LOC100040635  
LOC100042555  
LOC100043125  
LOC236118  
LOC621852  
LOC625638  
LOC634428  
LRG1  
LRP2  
LRRC38  
LRRC4B  
LRRN2  
LRSAM1  
LRTM2  
LSAMP  
LTK  
LUM  
LVRN  
LY6H  
LYZ  
MACF  
MAFA  
MAGEA10  
MAPT  
MAST1  
MATN4  
MDGA2  
MEGF11  
MGA  
MIXL1  
MKIAA0237  
MKIAA1422  
MKIAA1747  
MKIAA1998  
MKIAA3015  
MLXIPL  
MMP9  
MNX1  
MPHOSPH1  
MPPED1  
MRAS  
MSN  
MSX3  
MTAP2

MTAP7  
MYO1A  
MYO3A  
MYOD1  
NAGS  
NDPH  
NEFH  
NELL1  
NELL2  
NEUROD1  
NEUROD2  
NEUROG1  
NEUROG3  
NGFR  
NHLRC1  
NKX-1.2  
NKX1-2  
NKX2-2  
NKX2-3  
NKX2-4  
NKX2-5  
NKX2-6  
NKX2-9  
NKX3-1  
NKX3-2  
NKX6-2  
NLRP6  
NODAL  
NOVA2  
NPAS1  
NPHS1  
NPHS2  
NPPC  
NPR1  
NPR3  
NPTX1  
NPTX2  
NPW  
NPY5R  
NR2E1  
NR5A1  
NRG3  
NRN1  
NRTN  
NRXN2  
NR\_002839

NR\_002866  
NR\_003248  
NSG1  
NSUN6  
NT5C2  
NTN1  
NTSR1  
NUDT10  
NXPH1  
NXPH4  
OCLN  
OLFR1056  
OLFR11  
OLFR1167  
OLFR1209  
OLFR1255  
OLFR133  
OLFR1404  
OLFR1410  
OLFR166  
OLFR31  
OLFR48  
OLFR527  
OLFR772  
OLFR814  
OLFR923  
OLFR944  
OLIG2  
OLIG3  
ONECUT1  
ONECUT2  
ONECUT3  
OPRD1  
ORAI3  
OSBP2  
OTP  
OTTMUSG00000016411  
OTTMUSG00000016790  
OTTMUSG00000017155  
OTTMUSG00000017156  
OTX2  
OVOL1  
OVOL2  
OXCT2A  
OXCT2B  
OXTR

P2RX2  
PAQR9  
PAX1  
PAX2  
PAX3  
PAX4  
PAX5  
PAX6  
PAX7  
PAX9  
PCDH1  
PCDH10  
PCDH21  
PCDH8  
PDCD4  
PDE10A  
PDE2A  
PDGFB  
PFDN4  
PFN3  
PHACTR3  
PHOX2A  
PHOX2B  
PHPT1  
PIGZ  
PIK3C2B  
PITX1  
PITX2  
PKP1  
PLL  
PLXDC1  
PLXND1  
PNMA2  
PNMT  
PNOC  
POU3F1  
POU3F2  
POU3F3  
POU4F1  
POU4F2  
POU4F3  
PPFIA2  
PPL  
PPOX  
PPP1R1A  
PPP1R1B



PPP1R2  
PPP2R2C  
PPP3R1  
PPWD1  
PRDM13  
PRDM14  
PRDM8  
PRG2  
PRKCZ  
PRL7D1  
PRMT8  
PROM2  
PRPH  
PRR18  
PRRXL1  
PSMB2  
PTF1A  
PTGDR  
PTPRB  
PVALB  
PYY  
QRICH2  
RAD17  
RAET1E  
RANBP5  
RARRES1  
RASD1  
RASD2  
RASGRF1  
RAX  
RBBP6  
RBM28  
RBM35A  
RBMXL2  
RBPJL  
RDH9  
RGL3  
RHCG  
RHOX2  
RHOX3  
RHOX4A  
RHOX4B  
RHOX4C  
RHOX4D  
RHOX4E  
RHOX4G

RHOX4H  
RHOX9  
RIC3  
RIMS1  
RIPPLY2  
RRS1  
RSPO1  
RTBDN  
RTN4RL1  
RUNX3  
RXFP3  
RZR2  
SAA2  
SALL3  
SCT  
SEMA5B  
SENP7  
SERPINI2  
SEZ6L  
SEZ6L2  
SH3BP5L  
SHH  
SIGIRR  
SIM2  
SIX2  
SIX3  
SIX6OS1  
SLBP  
SLC10A4  
SLC12A5  
SLC13A3  
SLC15A1  
SLC16A9  
SLC18A3  
SLC22A3  
SLC24A4  
SLC25A14  
SLC30A2  
SLC30A3  
SLC44A5  
SLC47A1  
SLC4A7  
SLC6A11  
SLC6A2  
SLC6A3  
SLC6A5

SLC7A14  
SLC9A3  
SLIT1  
SLIT3  
SLITRK1  
SMOC1  
SMYD5  
SNTG1  
SOX1  
SOX10  
SOX18  
SOX2  
SOX21  
SOX7  
SP5  
SP6  
SP8  
SP9  
SPATA18  
SPEER4A  
SPEER4B  
SPEG  
SPNB4  
SPRN  
SPRR1B  
SRD5A2  
SRMS  
SRPX  
SST  
SSTR1  
SSTR5  
ST6GALNAC5  
ST8SIA1  
ST8SIA3  
ST8SIA6  
STK32C  
STMN3  
SYPL2  
SYT6  
T  
T2  
TACSTD2  
TAF1  
TAL1  
TBR1  
TBX1

TBX20  
TBX21  
TBX4  
TCEAL8  
TCF15  
TCFAP2D  
TDRD5  
TESC  
TESTICAN-2  
TEX101  
TFAM  
THAP11  
TIAM2  
TIFP39  
TITF1  
TLL2  
TLR12  
TLX1  
TLX2  
TLX3  
TMEM132E  
TMEM163  
TMPRSS2  
TMSB4X  
TMTC1  
TNFRSF8  
TNRC6A  
TNXB  
TPPP  
TPSAB1  
TRADV16D  
TRHDE  
TRIM58  
TRIM67  
TRIM9  
TRP53INP2  
TRP73  
TRPM2  
TSC22D1  
TSSC1  
TTC22  
TTC9B  
TUBGCP5  
TYRO3  
U20367  
UBE1L2

UBE1Y1  
UCN  
UNC13B  
UNC5A  
UNCX4.1  
USH1G  
USP30  
UTF1  
V1RE4  
V1RH12  
VASH1  
VAX1  
VDR  
VGLL2  
VIPR1  
VMN2R92  
VPS4A  
VSX1  
VSX2  
VWA2  
VWC2  
WDR24  
WEE2  
WIZ  
WNK4  
WNT10A  
WNT3  
WNT6  
WNT7B  
WT1  
XKR7  
XLR3A  
XLR3B  
XLR4A  
XLR4B  
XLR4C  
XLR5A  
XLR5C  
XTRP3S1  
YEATS4  
YME1L1  
ZAR1  
ZBTB7C  
ZCCHC12  
ZFP459  
ZFYVE28

ZGPAT  
ZIC1  
ZIC2  
ZIC5  
ZNRF4  
ZSWIM2  
ZSWIM5









## **Expressed cerebellum H3K27me3 targets**

### **This Study**

**116**

ADORA1  
ADORA2B  
AFF1  
AHNAK  
ANXA11  
ARHGEF17  
ARL4C  
ARNTL  
ASS1  
ATP2A3  
BDNF  
BEGAIN  
BMP7  
CACNA1G  
CACNA2D2  
CBR3  
CBS  
CCKBR  
CD14  
CDC14B  
CDH22  
CDK5R2  
CHN1  
COBL  
COL13A1  
COL4A1  
CPEB1  
DAB1  
DCTN1  
DGKG  
DNM3  
DYNLT1  
EGR4  
EPAS1  
EPHA4  
EXOSC2  
FBXO2  
FGFR2  
FGFR3  
FOXF2  
GABRD

GAD1  
GAD2  
GADD45B  
GAS2L1  
GFPT2  
GNAS  
GPRC5C  
GRIN2C  
H1FO  
HPCAL4  
HSPA12A  
HSPA2  
HSPB1  
HTRA1  
ITGB5  
JAG2  
KCNA1  
KCNB1  
KCNK12  
KCNN2  
LBA1  
LRP4  
MAF  
MAL  
MCAM  
MEIS2  
NAB2  
NBL1  
NEFH  
NEFL  
NKX2-2  
NPTX1  
NR2F2  
NRIP3  
NRXN2  
OLIG2  
PAX2  
PCDH17  
PDE10A  
PDE4A  
PDE8A  
PDGFA  
PDGFRA  
PDLIM2  
PFDN4  
PLEC1

PLTP  
PLXDC1  
PPP1R16B  
PPP1R2  
PRKAG2  
PRKCZ  
PROX1  
PTK2B  
PTPRM  
PTPRN  
RASGRF1  
RB1CC1  
RORA  
RPL17  
SATB1  
SEMA3F  
SLC12A5  
SOX2  
SPEG  
SPOCK1  
TCFL5  
TM6SF1  
TMEM59L  
TNFRSF25  
TPM1  
TUBA4A  
WIZ  
ZBTB7A  
ZFP36L2





<  
<  
<

<  
<
